# Supplementary material for: MSH2 shapes the meiotic crossover landscape in relation to interhomolog polymorphism in Arabidopsis
Source: PubMed Central journal article supplement (PMC7604573; doi:10.15252/embj.2020104858), 2020-09-16
Supplement: EMBJ-39-e104858-s001.pdf [file EMBJ-39-e104858-s001.pdf]

1 **MSH2 shapes the meiotic crossover landscape in relation to**  
2 **interhomolog polymorphism in Arabidopsis**

3  
4 Alexander R. Blackwell, Julia Dluzewska, Maja Szymanska-Lejman, Stuart Desjardins,  
5 Andrew J. Tock, Nadia Kbiri, Christophe Lambing, Emma J. Lawrence, Tomasz  
6 Bieluszewski, Beth Rowan, James D. Higgins, Piotr A. Ziolkowski and Ian R. Henderson  
7

8  
9 **Appendix:**

10  
11 **Appendix Figures S1- S12**

12  
13 **Appendix Tables S1 - S13**  
14  
15  
16  
17  
18  
19  
20  
21  
22  
23  
24  
25  
26  
27  
28  
29  
30  
31  
32  
33  
34  
35  
36  
37  
38  
39  
40  
41  
42  
43  
44  
45  
46  
47  
48  
49  
50

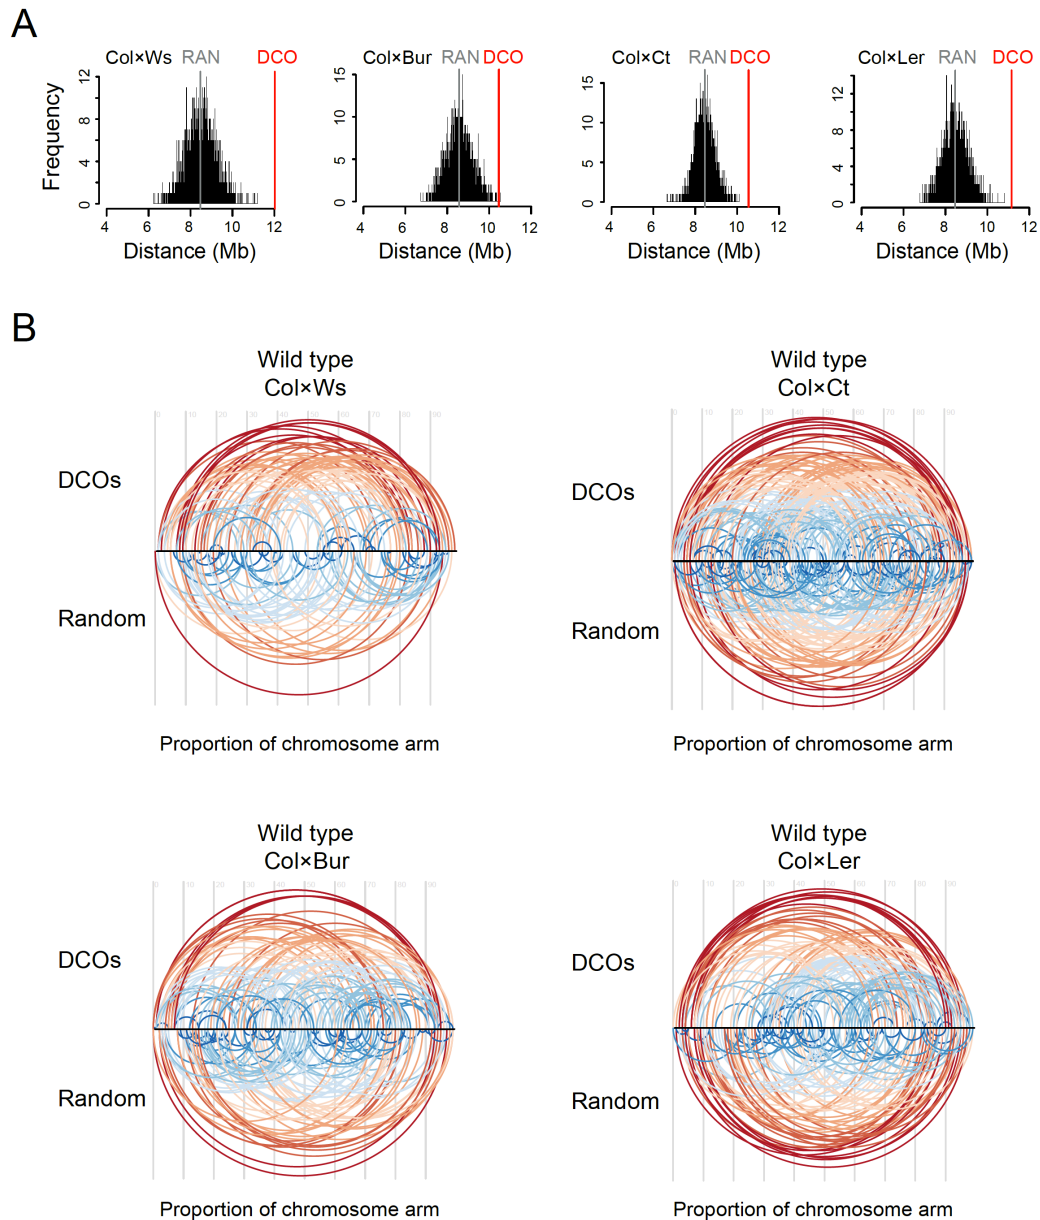

51

52

53 **Appendix Figure S1. Analysis of double crossover spacing in Col×Ler, Col×Bur,**  
 54 **Col×Ws and Col×Ct F<sub>2</sub> populations. A.** Histograms showing the mean distance  
 55 (megabases, Mb) of observed double crossovers (DCOs, red), compared to 2,000  
 56 matched sets of randomly generated distances (RAN, black). The means of the random  
 57 sets are shown in grey. *Cis*-DCOs were identified from F<sub>2</sub> genotyping data, by filtering for  
 58 parental-heterozygous-parental genotype transitions (e.g. Col-Het-Col or Ler-Het-Ler in  
 59 Col×Ler F<sub>2</sub> individuals) (Drouaud *et al*, 2005; Rowan *et al*, 2019; Lambing *et al*, 2020a). **B.**  
 60 Diagrams showing spacing of identified *cis* DCOs along the proportional physical length of  
 61 chromosomes (%). DCOs are connected via arcs and color-coded proportional to the  
 62 distance between them (red=greatest, blue=smallest).

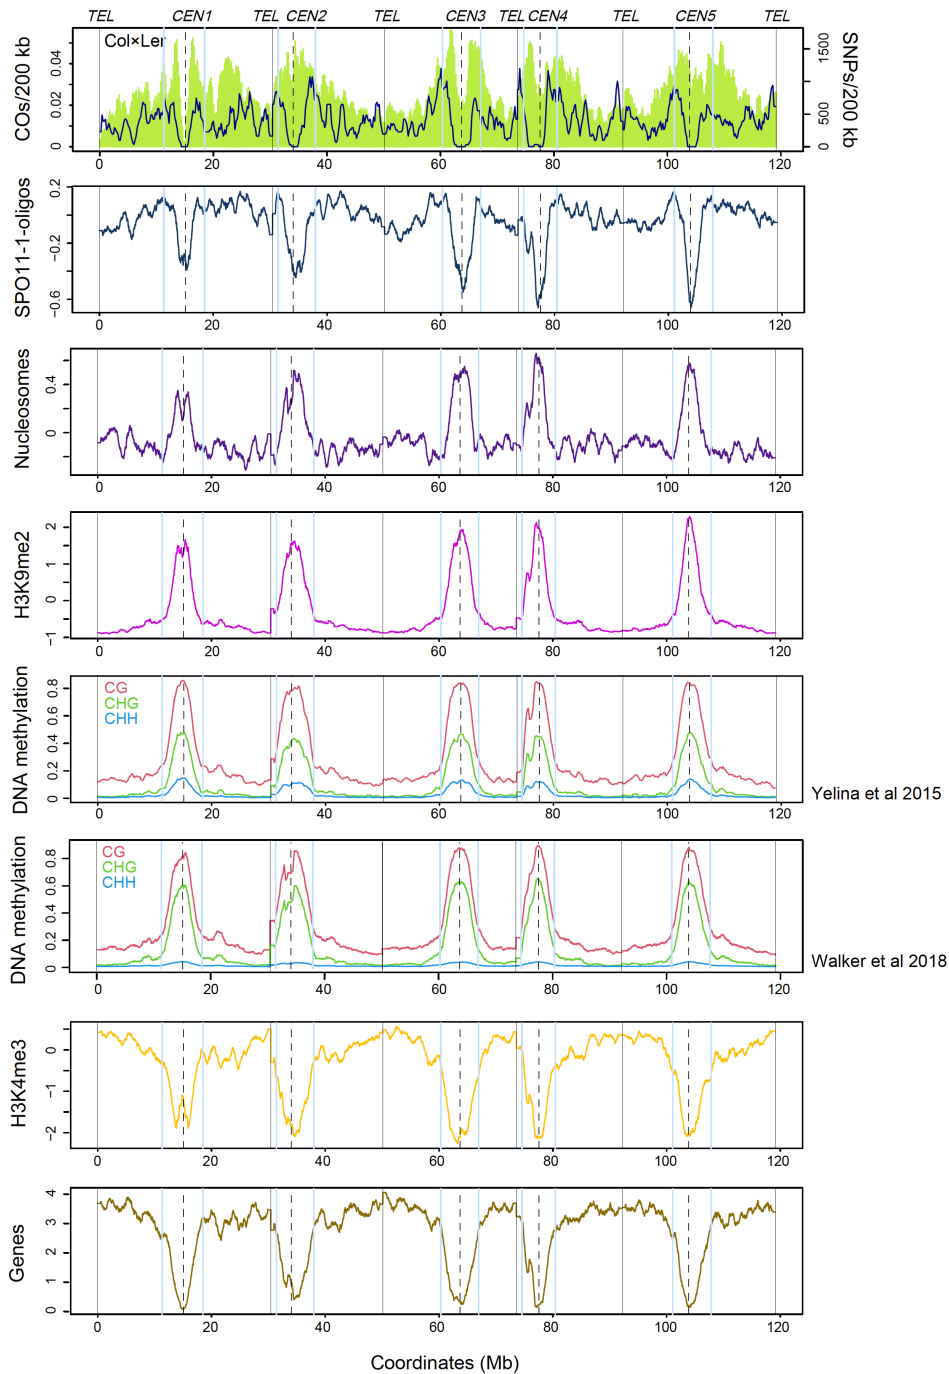

63  
64  
65  
66  
67  
68  
69  
70  
71  
72  
73  
74  
75

**Appendix Figure S2. Meiotic recombination, polymorphism and chromatin landscapes throughout the Arabidopsis genome.** Crossovers per 200 kb normalized by  $F_2$  individuals is plotted along the Arabidopsis chromosomes derived from a Col×Ler cross. Col/Ler SNPs per 200 kb are shaded in green. Note that the upper panel showing crossover frequency and SNPs is reproduced from Fig. 1B for ease of comparison. Beneath are plots of SPO11-1-oligos, nucleosomes (MNase-seq), H3K9me2, DNA methylation (CG, CHG and CHH contexts), H3K4me3 and gene density (Choi *et al*, 2018; Lambing *et al*, 2020b; Yelina *et al*, 2015; Choi *et al*, 2016). DNA methylation is shown from somatic and meiotic cells (Walker *et al*, 2018; Yelina *et al*, 2015). The positions of telomeres (TEL) and centromeres (CEN) are indicated. The boundaries of the pericentromeres are indicated by vertical light blue lines, flanking the centromere assembly gaps (vertical dashed black lines) (Underwood *et al*, 2018).

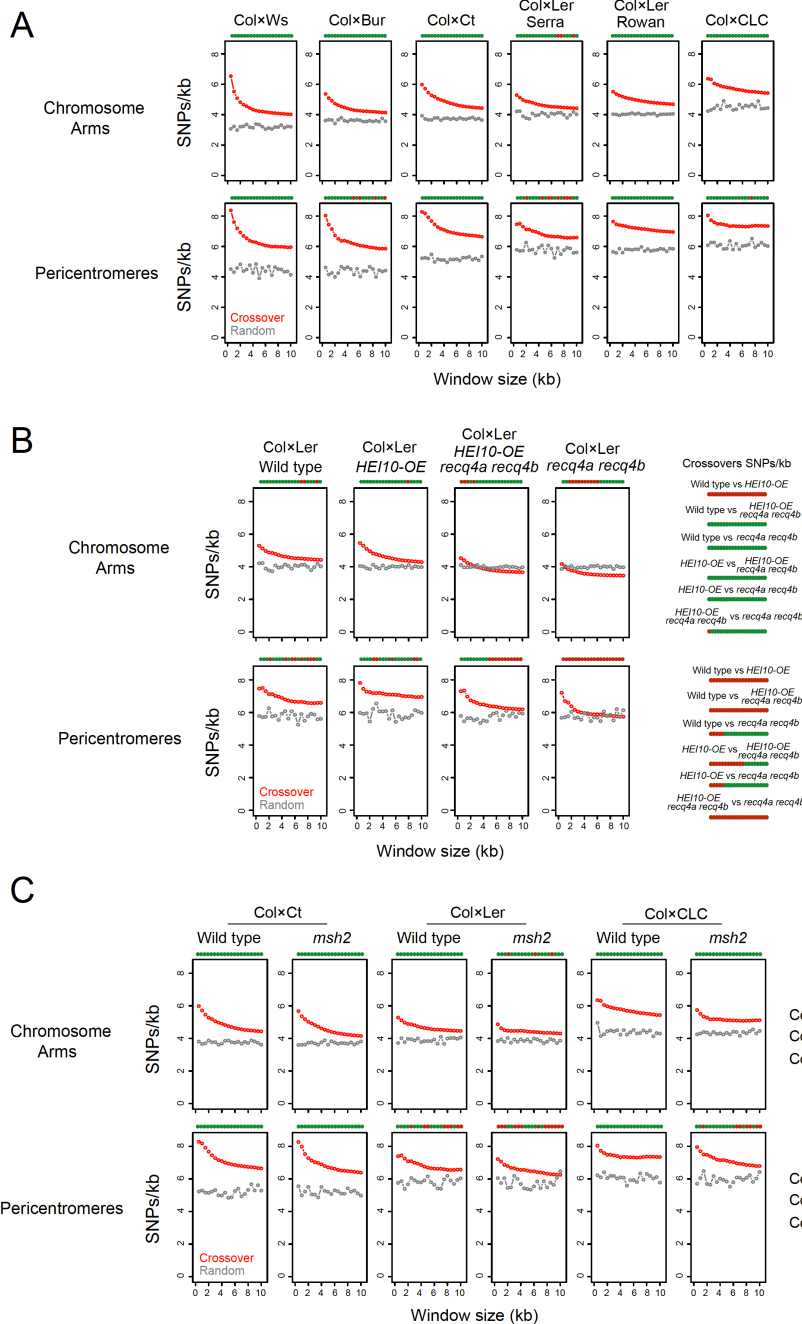

76  
77  
78  
79  
80  
81  
82  
83  
84  
85  
86  
87  
88  
89  
90

**Appendix Figure S3. Crossovers are positively associated with SNP density at the local scale in the chromosome arms and the pericentromeres.** **A.** SNPs/kb in physical windows of increasing size (kb) around crossover midpoints (red), or for matched randomly chosen positions (grey), analysed separately according to location within the chromosome arms or the pericentromeres (Underwood *et al*, 2018). Printed above the plot for each window is a circle colored green if crossover SNPs/kb values are significantly different to random ( $P < 0.05$ ), or red if not ( $P > 0.05$ ) (Bonferroni adjusted t-tests). The population (Col×Ws, Col×Bur (Lawrence *et al*, 2019), Col×Ct, Col×Ler (Serra *et al*, 2018; Rowan *et al*, 2019) and Col×CLC) is printed above each plot. **B.** As for A, but analysing Col/Ler SNPs/kb around crossovers from wild type, *HEI10-OE*, *recq4a recq4b* or *HEI10-OE recq4a recq4b* (Serra *et al*, 2018). All populations were generated from Col×Ler hybrids. To the right are plots showing significance of SNPs/kb differences between crossover sets, across the windows tested. **C.** As for A but analyzing SNPs/kb in wild type and *msh2* in the indicated cross.

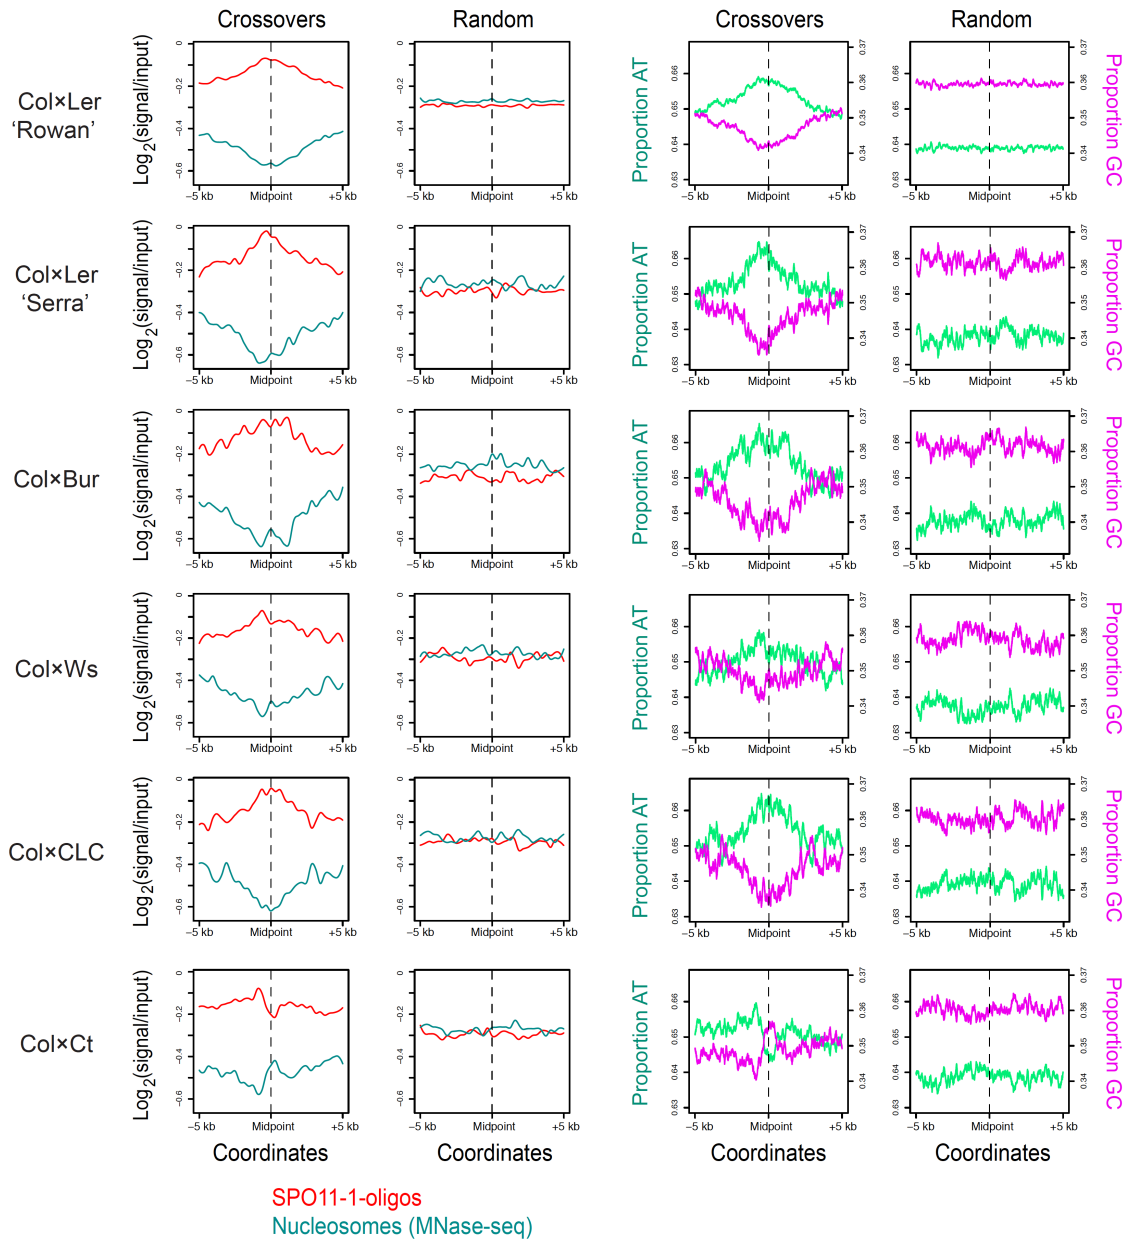

91  
92  
93  
94  
95  
96  
97  
98  
99  
100  
101  
102  
103  
104

**Appendix Figure S4. SPO11-1-oligonucleotides, nucleosome occupancy and base composition around wild type crossovers.** 10 kb windows surrounding crossover midpoints, or the same number of randomly selected positions, were analysed for SPO11-1-oligos ( $\log_2(\text{SPO11-1-oligos/gDNA})$ , red) or nucleosome occupancy ( $\log_2(\text{MNase-seq/gDNA})$ , blue) (Choi *et al.*, 2018). Base composition was analysed in the same windows and the proportion of AT (green) and GC (purple) plotted.



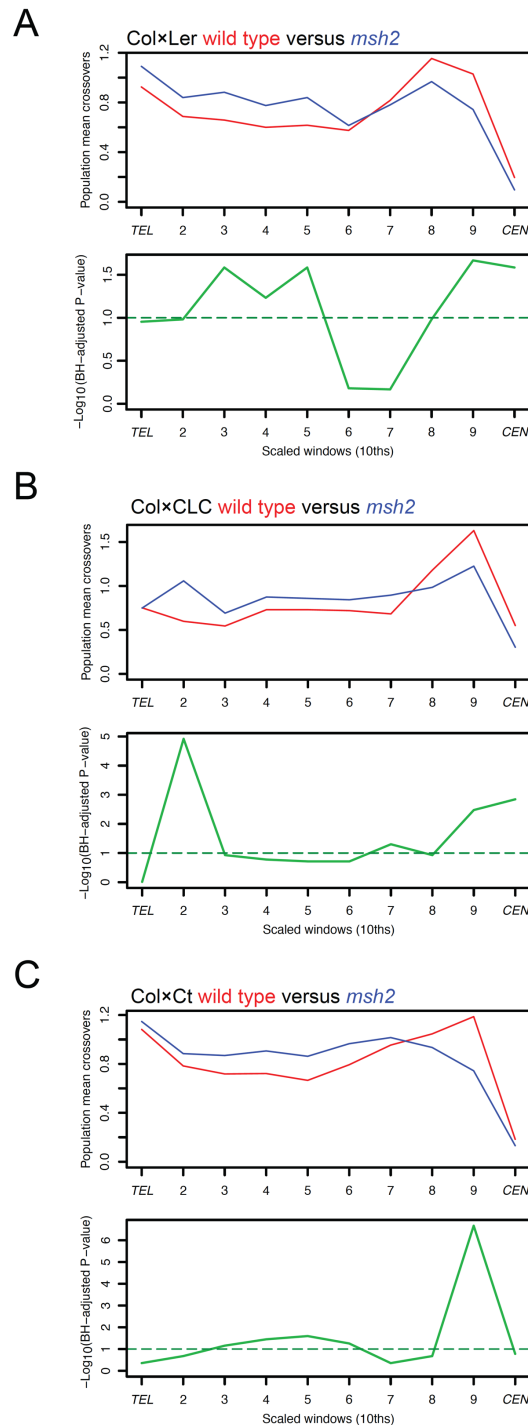

119  
120  
121  
122  
123  
124  
125  
126  
127  
128  
129  
130

**Appendix Figure S6. Significance of crossover frequency changes along the telomere to centromere chromosome axes in wild type versus *msh2*.** **A.** Crossover frequency in 10 scaled windows along the proportional length of all chromosome arms from telomeres (*TEL*) to centromeres (*CEN*) in Col x Ler wild type (red) and *msh2* (blue) F<sub>2</sub> populations. The Benjamini-Hochberg (BH) multiple-testing-corrected *P*-values (green) are plotted beneath, which are derived using a Poisson model to compare crossover counts in each scaled window, summed across all chromosome arms, between wild type and *msh2* populations. Horizontal dashed lines correspond to a BH multiple-testing-corrected *P*-value threshold of  $-\log_{10}(0.1)$  (green). **B.** As for A, but comparing wild type and *msh2* in a Col x CLC background. **C.** As for A, but comparing wild type and *msh2* in a Col x Ct background.

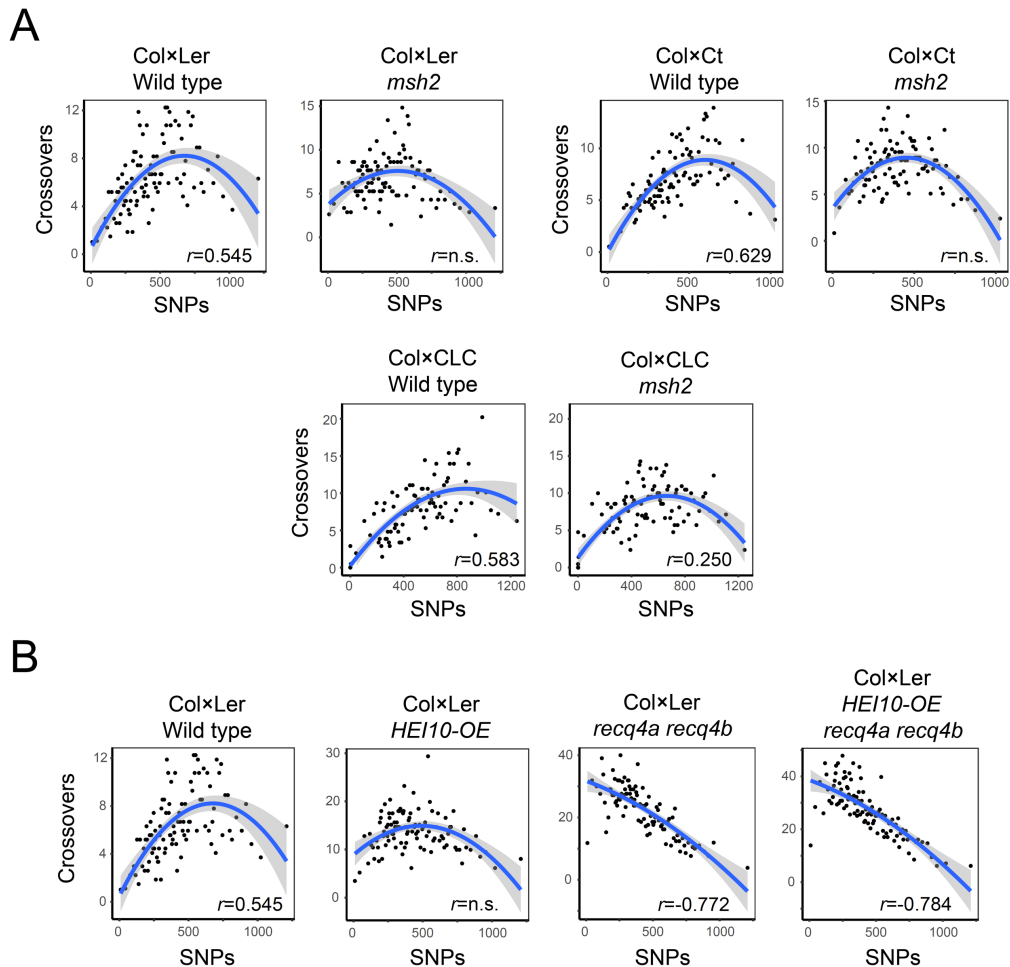

131  
 132  
 133  
 134  
 135  
 136  
 137  
 138  
 139  
 140  
 141  
 142  
 143  
 144  
 145  
 146  
 147  
 148  
 149  
 150  
 151  
 152  
 153  
 154  
 155  
 156

**Appendix Figure S7. Correlations between crossover frequency and SNP density in wild type, *msh2*, *HEI10-OE*, *recq4a recq4b* and *HEI10-OE recq4a recq4b*.** **A.** Crossover frequency normalised by the number of  $F_2$  individuals, and SNP density were calculated in 100 kilobase (kb) adjacent windows for each wild type and *msh2* population. Centromeric regions were excluded from analysis (Underwood *et al*, 2018). Windows were ranked into SNP density percentiles and values plotted. Spearman's rank correlation coefficient ( $r$ ) between SNP density and crossover frequency is printed inset. Trend lines were fitted in ggplot using generalized additive model (GAM) with the formula  $y \sim \text{poly}(x, 2)$ . Note that the wild type Col×Ler, Col×Ct and Col×CLC datasets are reproduced from Figure 2A. **B.** As for A but analyzing crossovers in Col/Ler wild type, *HEI10-OE*, *recq4a recq4b* and *HEI10-OE recq4a recq4b*. Note that the wild type Col×Ler dataset is reproduced from Figure 2A.



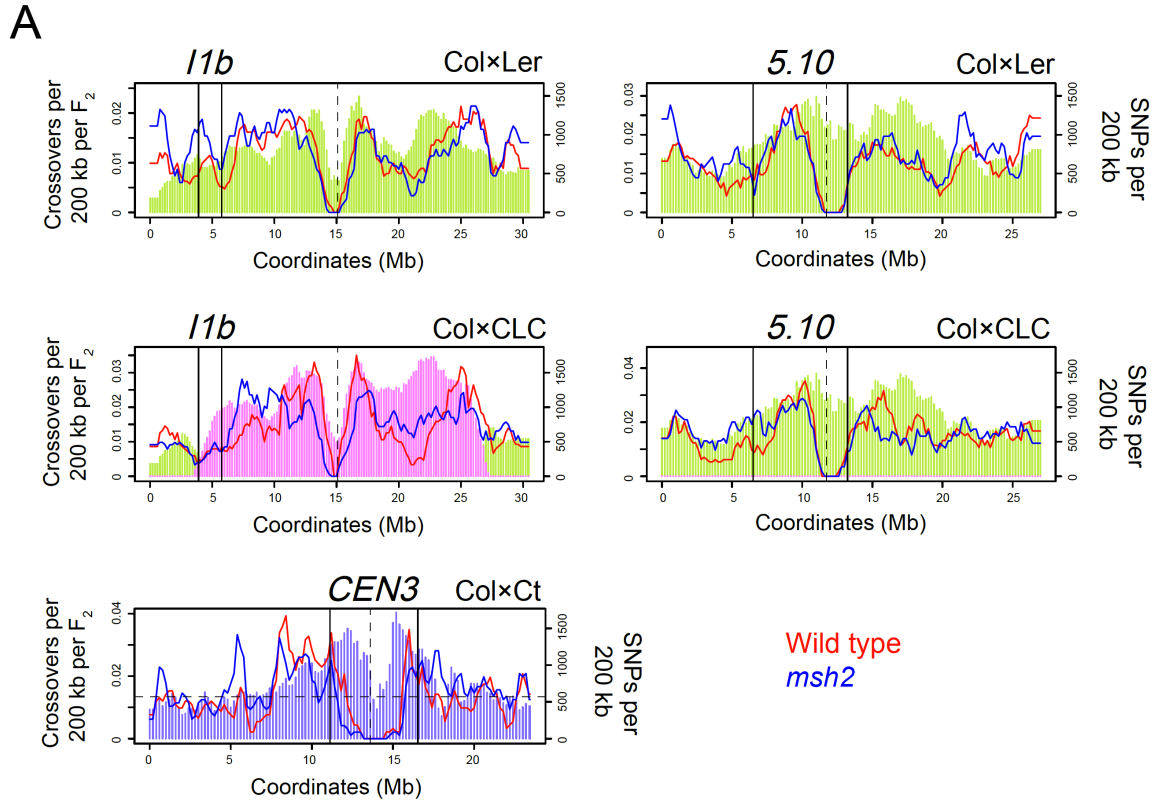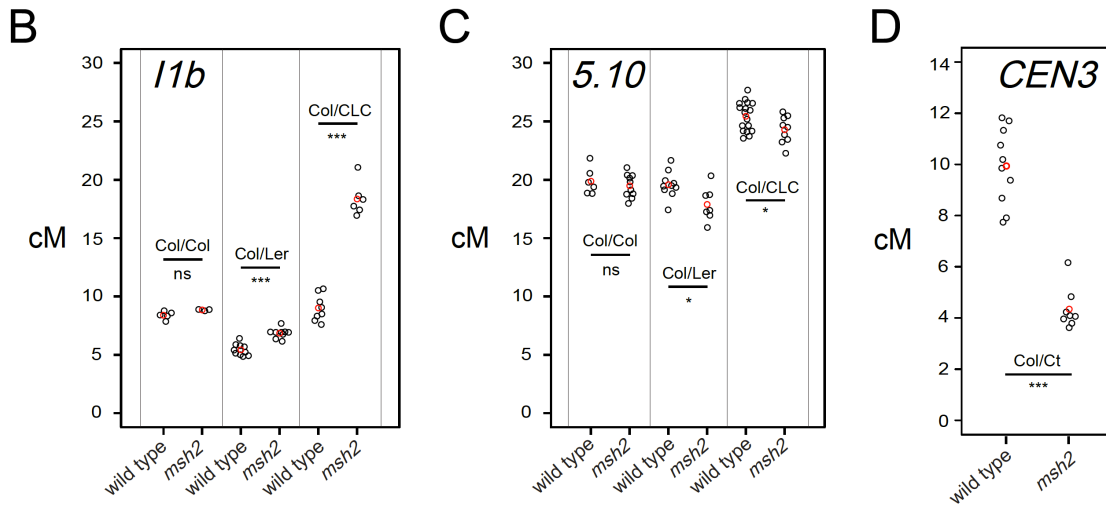

157  
158  
159  
160  
161  
162  
163  
164  
165  
166  
167  
168  
169  
170

**Appendix Figure S8. Measuring crossover frequency using FTLs in wild type and *msh2* in inbred, Col x Ler, Col x CLC and Col x Ct backgrounds.** **A.** Crossovers per 200 kb per  $F_2$  plotted along Arabidopsis chromosomes 1, 3 and 5 from wild type (red) and *msh2* (blue), from Col x Ler, Col x CLC and Col x Ct hybrids. SNP density per 200 kb is shaded. The positions of the *I1b*, *5.10* and *CEN3* FTL T-DNAs are indicated by black vertical lines. The centromere positions are indicated by vertical dashed lines. **B.** *I1b* genetic distance (cM) measured in Col x Col inbred or Col x Ler and Col x CLC hybrids, in wild type and *msh2*. Black dots represent replicates and red dots represent genotype means. Statistical significance was assessed using  $\chi^2$  tests and  $P$  values are indicated as  $<0.05$  (\*),  $0.01$  (\*\*) and  $0.001$  (\*\*\*), or not significant (ns). **C.** As for C, but for FTL interval *5.10*. **D.** As for A, but for FTL interval *CEN3* in Col x Ct hybrids.

### Proportion of chromosome arm

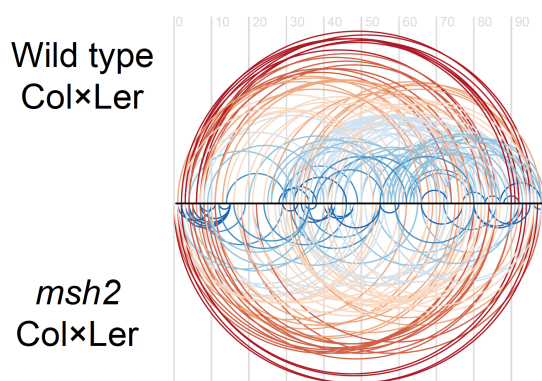

### Proportion of chromosome arm

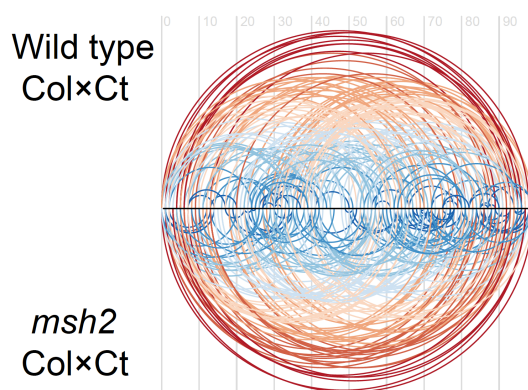

171  
172  
173  
174  
175  
176  
177  
178  
179  
180  
181  
182  
183  
184  
185  
186  
187  
188  
189  
190  
191  
192  
193  
194

**Appendix Figure S9. Double crossover analysis in wild type and *msh2*.** Diagrams showing spacing of identified *cis* DCOs along the proportional physical length of chromosomes (%). *Cis*-DCOs were identified from F<sub>2</sub> genotyping data, by filtering for parental-heterozygous-parental genotype transitions (e.g. Col-Het-Col or Ler-Het-Ler in Col x Ler F<sub>2</sub> individuals) (Drouaud *et al*, 2005; Rowan *et al*, 2019; Lambing *et al*, 2020a). DCOs are connected via arcs and proportionally color-coded according to the distance between them (red=greatest, blue=smallest).

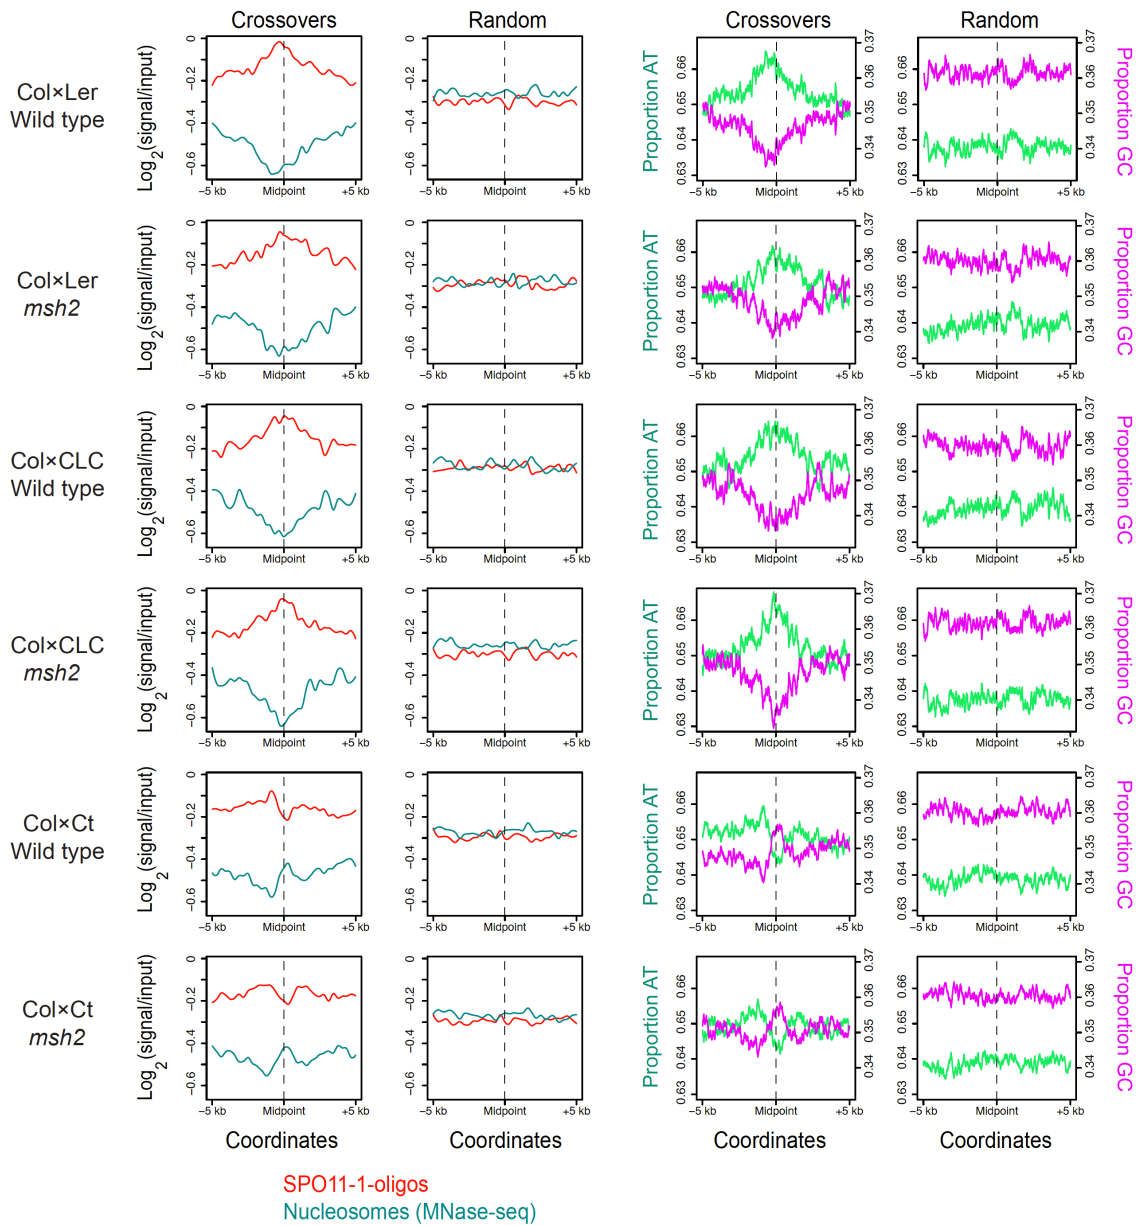

196

197

198

199

200

201

202

203

204

205

206

207

208

209

210

211

212

**Appendix Figure S10. SPO11-1-oligonucleotides, nucleosome occupancy and base composition around wild type and *msh2* crossovers.** 10 kb windows surrounding crossover midpoints, or the same number of randomly selected positions, were analysed for SPO11-1-oligos ( $\log_2(\text{SPO11-1-oligos/gDNA})$ , red) or nucleosome occupancy ( $\log_2(\text{MNase-seq/gDNA})$ , blue) (Choi *et al*, 2018). Base composition was analysed in the same windows and the proportion of AT (green) and GC (purple) plotted. Note that the wild type ColxLer, ColxCt and ColxCLC datasets are reproduced from Appendix Figure 4.

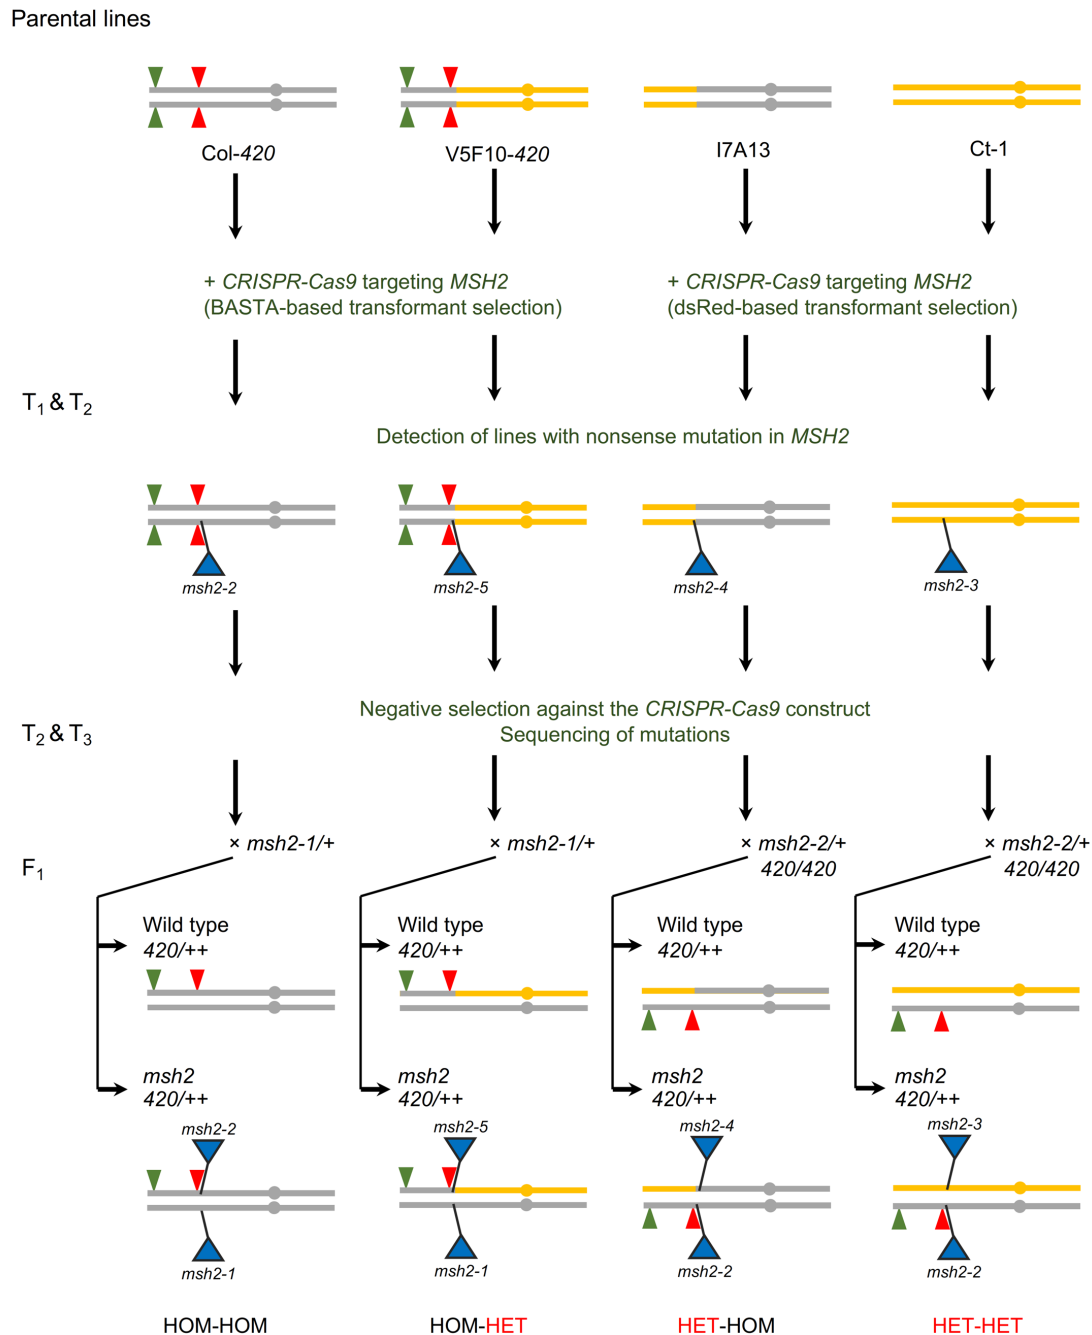

213  
214  
215  
216  
217  
218  
219  
220  
221  
222  
223  
224

**Appendix Figure S11. Generation of *msh2* mutants with varying patterns of Col/Ct heterozygosity and carrying the 420 FTL.** Parental lines with fixed regions of Col and Ct homozygosity along chromosome 3 were previously characterized (Ziolkowski *et al*, 2015). Chromosome ideograms represent sequence polymorphism along chromosome three, with grey corresponding to Col and yellow corresponding to Ct. The locations of the 420 FTLs (red and green triangles) used to measure crossover frequency are indicated. Note that the *MSH2* gene is closely linked to 420.

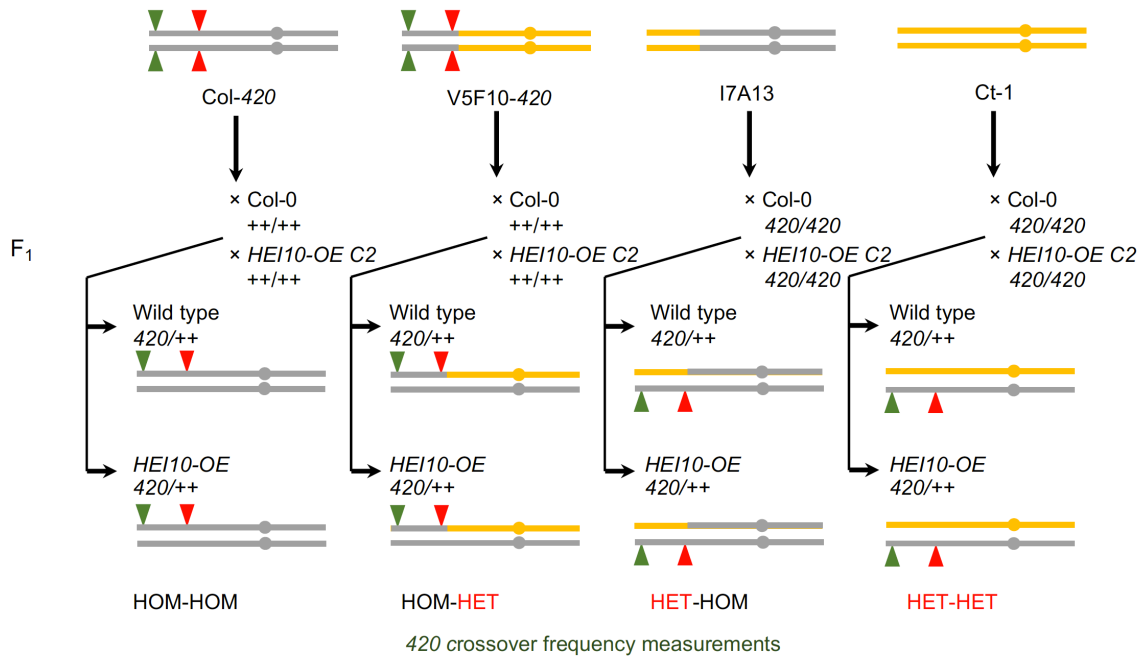

225  
226  
227  
228  
229  
230  
231  
232  
233  
234  
235  
236  
237  
238  
239  
240  
241  
242  
243  
244  
245  
246  
247  
248  
249  
250  
251  
252  
253  
254  
255  
256

**Appendix Figure S12. Generation of *HEI10-OE* overexpression lines with varying patterns of Col/Ct heterozygosity and carrying the *FTL 420*.** Parental lines with fixed regions of Col and Ct homozygosity along chromosome three were previously characterized (Ziolkowski *et al*, 2015). These lines were crossed with the *HEI10-OE C2* line (Ziolkowski *et al*, 2017). The locations of the *420* FTLs (red and green triangles) used to measure *420* crossover rate are indicated.

257  
258  
259  
260  
261  
262

**Appendix Table S1. Single nucleotide polymorphism (SNP) numbers between the accessions used for crossover mapping.** SNPs were identified for the Ler, Bur, Ws, Ct and CLC backgrounds relative to the Col TAIR10 reference. Identified SNP numbers are shown for each chromosome and in total for the indicated comparisons. SNPs/kb values are assuming a genome size of 125,000 kb.

| Chromosome | Col×Ws  | Col×Bur | Col×Ct  | Col×Ler | Col×CLC |
|------------|---------|---------|---------|---------|---------|
| Chr 1      | 97,894  | 111,749 | 117,181 | 125,326 | 156,778 |
| Chr 2      | 72,785  | 73,221  | 71,313  | 86,603  | 78,608  |
| Chr 3      | 85,465  | 86,621  | 91,108  | 99,167  | 127,386 |
| Chr 4      | 54,965  | 69,992  | 81,292  | 84,733  | 75,646  |
| Chr 5      | 102,721 | 104,778 | 114,793 | 124,005 | 124,005 |
| Total      | 413,830 | 446,361 | 475,687 | 519,834 | 562,423 |
| SNPs/kb    | 3.31    | 3.57    | 3.81    | 4.16    | 4.50    |

263  
264  
265  
266  
267  
268  
269  
270  
271  
272  
273  
274  
275  
276  
277  
278  
279  
280  
281  
282  
283  
284  
285  
286  
287  
288  
289  
290  
291  
292  
293  
294  
295  
296  
297  
298  
299  
300

301 **Appendix Table S2. Percentage of single nucleotide polymorphisms shared**  
 302 **between accessions used for crossover mapping.** SNPs were identified for the Ws,  
 303 Bur, Ct, Ler and CLC backgrounds relative to the Col TAIR10 reference. The 'Total'  
 304 column lists the total SNPs identified for the accessions listed in the first Column. The  
 305 remaining columns show the proportion of SNPs shared with the indicated genotypes,  
 306 relative to Col.  
 307

| Genotype | Total  | Ws   | Bur  | Ct   | Ler  | CLC  |
|----------|--------|------|------|------|------|------|
| Ws       | 413830 | -    | 0.42 | 0.44 | 0.47 | 0.41 |
| Bur      | 446361 | 0.38 | -    | 0.41 | 0.43 | 0.39 |
| Ct       | 475687 | 0.38 | 0.39 | -    | 0.46 | 0.40 |
| Ler      | 519834 | 0.38 | 0.37 | 0.42 | -    | 0.42 |
| CLC      | 562423 | 0.30 | 0.31 | 0.33 | 0.55 | -    |

308  
 309  
 310  
 311  
 312  
 313  
 314  
 315  
 316  
 317  
 318  
 319  
 320  
 321  
 322  
 323  
 324  
 325  
 326  
 327  
 328  
 329  
 330  
 331  
 332  
 333  
 334  
 335  
 336  
 337  
 338  
 339  
 340  
 341  
 342  
 343  
 344  
 345  
 346  
 347

348  
349  
350  
351  
352  
353  
354  
355  
356  
357  
358

**Appendix Table S3. Crossovers mapped by genotyping-by-sequencing of wild type and *msh2* F<sub>2</sub> populations.** The total number of crossovers analysed in each population are listed in total and per chromosome. The number of F<sub>2</sub> individuals analysed and the average number of crossovers per F<sub>2</sub> are listed. The average width (bp) for crossovers identified in each population is listed. For the Col×Ler maps two data sets using 17,077 crossovers ('Rowan' (Rowan *et al*, 2019)) and 1,809 crossovers ('Serra' (Serra *et al*, 2018)) were analyzed. The Col×Bur data was reported as a control for *taf4b* (Lawrence *et al*, 2019). The Col×Ler and Col×CLC data used as wild type controls for *msh2* have a lower crossover number due to additional masking of Col introgressions required for comparison with *msh2*.

| Genotype            | Total  | Chr1  | Chr2  | Chr3  | Chr4  | Chr5  | F <sub>2</sub> | Width (bp) | CO/F <sub>2</sub> |
|---------------------|--------|-------|-------|-------|-------|-------|----------------|------------|-------------------|
| Col×Ler Rowan       | 17,077 | 4,153 | 3,021 | 3,191 | 2,825 | 3,887 | 2,182          | 3,261      | 7.83              |
| Col×Ler Serra       | 1,840  | 437   | 326   | 345   | 309   | 423   | 245            | 1,045      | 7.51              |
| Col×Bur             | 1,396  | 341   | 223   | 259   | 251   | 322   | 180            | 653        | 7.76              |
| Col×Ws              | 1,485  | 379   | 265   | 277   | 232   | 332   | 188            | 2,262      | 7.90              |
| Col×CLC             | 1,587  | 420   | 233   | 279   | 264   | 391   | 189            | 725        | 8.40              |
| Col×Ct              | 2,478  | 617   | 438   | 485   | 394   | 544   | 305            | 1,161      | 8.12              |
| Genotype            | Total  | Chr1  | Chr2  | Chr3  | Chr4  | Chr5  | F <sub>2</sub> | Width (bp) | CO/F <sub>2</sub> |
| Col×Ler WT          | 1,739  | 434   | 320   | 276   | 295   | 414   | 240            | 1,036      | 7.25              |
| Col×Ler <i>msh2</i> | 1,426  | 362   | 270   | 209   | 228   | 357   | 187            | 1,260      | 7.63              |
| Col×CLC WT          | 1,534  | 420   | 233   | 226   | 264   | 391   | 189            | 727        | 8.12              |
| Col×CLC <i>msh2</i> | 1,620  | 421   | 253   | 278   | 261   | 407   | 191            | 1,056      | 8.48              |
| Col×Ct WT           | 2,478  | 617   | 438   | 485   | 394   | 544   | 305            | 1,161      | 8.12              |
| Col×Ct <i>msh2</i>  | 2,702  | 675   | 456   | 540   | 425   | 606   | 320            | 1,526      | 8.44              |

359  
360  
361  
362  
363  
364  
365  
366  
367  
368  
369  
370  
371  
372  
373  
374  
375  
376  
377  
378  
379  
380  
381  
382  
383



384 **Appendix Table S4. Correlation between crossover frequency with varying physical**  
 385 **window sizes in wild type F<sub>2</sub> populations.** Varying window sizes (kb) were used to  
 386 calculate crossover frequency in the indicated populations throughout the genome. These  
 387 values were used to calculate Spearman's rank correlation coefficient.  
 388

| Crossovers      | Crossovers      | Windows (kb) |       |       |       |       |       |
|-----------------|-----------------|--------------|-------|-------|-------|-------|-------|
|                 |                 | 10           | 50    | 100   | 200   | 500   | 1000  |
| Col×Ler (Serra) | Col×Ler (Rowan) | 0.544        | 0.776 | 0.856 | 0.904 | 0.932 | 0.935 |
| Col×Ler         | Col×Bur         | 0.233        | 0.496 | 0.615 | 0.712 | 0.740 | 0.703 |
| Col×Ler         | Col×Ws          | 0.230        | 0.428 | 0.509 | 0.580 | 0.646 | 0.681 |
| Col×Ler         | Col×CLC         | 0.268        | 0.460 | 0.539 | 0.602 | 0.660 | 0.636 |
| Col×Ler         | Col×Ct          | 0.267        | 0.562 | 0.698 | 0.796 | 0.864 | 0.881 |

389  
 390  
 391  
 392  
 393  
 394  
 395  
 396  
 397  
 398  
 399  
 400  
 401  
 402  
 403  
 404  
 405  
 406  
 407  
 408  
 409  
 410  
 411  
 412  
 413  
 414  
 415  
 416  
 417  
 418  
 419  
 420  
 421  
 422  
 423  
 424  
 425  
 426  
 427  
 428

429 **Appendix Table S5. Generalized linear model showing the relationship between**  
 430 **crossovers, SPO11-1-oligos and chromatin.** The incidence of one or more crossover  
 431 within 534,775 Col/Ler SNP intervals was treated as a categorical variable (Serra *et al*,  
 432 2018). SPO11-1-oligo, nucleosome occupancy (MNase-seq), H3K4me3, DNA methylation  
 433 and SNPs/kb were calculated in the same intervals as explanatory variables. For SNP  
 434 density we calculated a rolling average of SNPs/kb with a 1 base pair step and used these  
 435 values to calculate mean SNPs per interval. The width of the intervals was also  
 436 considered in the model, with the formula:

437  $\text{Crossovers} \sim (\text{SPO11-1-oligos} + \text{nucleosomes} + \text{H3K4me3} + \text{DNA methylation} + \text{SNPs/kb}$   
 438  $+ \text{width})^2$

439 The final stepAIC-selected model was:

440  $\text{Crossovers} \sim \text{SPO11-1} + \text{nucleosomes} + \text{H3K4me3} + \text{DNA methylation} + \text{SNPs/kb} +$   
 441  $\text{width} + \text{SPO11-1:nucleosomes} + \text{SPO11-1:DNA methylation} + \text{SPO11-1:width} +$   
 442  $\text{nucleosomes:H3K4me3} + \text{nucleosomes:DNA methylation} + \text{nucleosomes:SNPs/kb} +$   
 443  $\text{H3K4me3:DNA methylation} + \text{H3K4me3:width} + \text{DNA methylation:width} + \text{SNPs/kb:width}$

444 The output of the model analysis is shown in the table reporting the coefficients estimate,  
 445 the estimated standard error, the z-value and a two-tailed *P*-value ( $\text{Pr}(>|z|)$ ) corresponding  
 446 to the z ratio.  
 447

|                             | Coefficients Estimate  | Standard Error        | z-value | Pr(> z )                |
|-----------------------------|------------------------|-----------------------|---------|-------------------------|
| (Intercept)                 | -4.246                 | 0.044                 | -97.063 | 0                       |
| SPO11-1-oligos              | 0.048                  | 0.047                 | 1.0123  | 0.311                   |
| Nucleosomes                 | -0.278                 | 0.044                 | -6.357  | $2.06 \times 10^{-10}$  |
| H3K4me3                     | -0.245                 | 0.033                 | -7.376  | $1.63 \times 10^{-13}$  |
| DNA methylation             | -1.47                  | 0.309                 | -4.767  | $1.87 \times 10^{-6}$   |
| SNPs/kb                     | -92.475                | 4.783                 | -19.334 | $2.74 \times 10^{-83}$  |
| Width                       | $1.79 \times 10^{-4}$  | $1.81 \times 10^{-4}$ | 9.862   | $6.06 \times 10^{-23}$  |
| SPO11-1:Nucleosomes         | 0.070                  | 0.037                 | 1.880   | 0.060                   |
| SPO11-1:DNA methylation     | 0.506                  | 0.261                 | 1.942   | 0.052                   |
| SPO11-1:Width               | $1.93 \times 10^{-4}$  | $4.36 \times 10^{-4}$ | 4.419   | $9.93 \times 10^{-6}$   |
| Nucleosomes:H3K4me3         | -0.090                 | 0.026                 | -3.447  | $5.67 \times 10^{-4}$   |
| Nucleosomes:DNA methylation | -0.413                 | 0.207                 | -1.989  | 0.047                   |
| Nucleosomes:SNPs/kb         | 13.106                 | 4.386                 | 2.988   | $2.80 \times 10^{-3}$   |
| H3K4me3:DNA methylation     | 1.4163                 | 0.196                 | 7.209   | $5.65 \times 10^{-13}$  |
| H3K4me3:Width               | $5.54 \times 10^{-4}$  | $2.16 \times 10^{-4}$ | 2.562   | 0.010                   |
| DNA methylation:Width       | $-4.06 \times 10^{-4}$ | $7.29 \times 10^{-4}$ | -5.572  | $2.52 \times 10^{-8}$   |
| SNPs/kb:Width               | 0.203                  | $7.53 \times 10^{-3}$ | 27.003  | $1.38 \times 10^{-160}$ |

448  
 449  
 450  
 451  
 452

453 **Appendix Table S6. Crossover numbers in centromeres, pericentromeres or**  
454 **chromosome arms in wild type and *msh2* populations.** The centromeres were  
455 previously defined as crossover suppressed regions in a wild type Col×Ler F<sub>2</sub> population,  
456 the pericentromeres as the contiguous regions surrounding the centromeres with higher  
457 than average DNA methylation, and the remainder of the chromosomes as the arms. We  
458 used 2×2 contingency tables and X<sup>2</sup> tests to assess whether the proportion of crossovers  
459 in the pericentromeres and centromeres versus the arms were different between the  
460 genotypes. We observed that *msh2* crossovers in Col×Ler, Col×CLC and Col×Ct  
461 backgrounds showed significant differences to wild type ( $P=1.69\times 10^{-7}$ ,  $P=1.00\times 10^{-11}$ ,  
462  $P=2.76\times 10^{-15}$ ).  
463

| Genotype    | Cross   | Arm   | Pericentromeres | Total |
|-------------|---------|-------|-----------------|-------|
| Wild type   | Col×Ler | 1,285 | 454             | 1,739 |
| <i>msh2</i> | Col×Ler | 1,166 | 260             | 1,426 |
| Wild type   | Col×CLC | 971   | 563             | 1,534 |
| <i>msh2</i> | Col×CLC | 1,208 | 412             | 1,620 |
| Wild type   | Col×Ct  | 1,861 | 617             | 2,478 |
| <i>msh2</i> | Col×Ct  | 2,269 | 433             | 2,702 |

464  
465  
466  
467  
468  
469  
470  
471  
472  
473  
474  
475  
476  
477  
478  
479  
480  
481  
482  
483  
484  
485  
486  
487  
488  
489  
490  
491  
492  
493  
494  
495  
496  
497  
498

499  
500  
501  
502  
503  
504  
505  
506  
507

**Appendix Table S7. *11b* fluorescent pollen count data for the wild type and *msh2* mutant in inbred and hybrid backgrounds.** Genetic distance in centimorgans (cM) is calculated as  $cM = 100 \times (N_Y / (N_Y + N_{R+Y}))$ , where  $N_Y$  is the number of yellow alone pollen, and  $N_{Y+R}$  is the number of red and yellow pollen.  $X^2$  tests comparing the number of recombinant (yellow alone) and non-recombinant (red and yellow) pollen counts were performed to test for significant differences between genotypes. The *11b* FTL T-DNAs are 3,905,442-eYFP and 5,755,618-dsRed2 that define a 1.85 Mb interval located interstitially on chromosome 1.

| Cross   | Genotype      | Total  | Red alone | Red + Yellow | Non-colour | Yellow alone | cM    |
|---------|---------------|--------|-----------|--------------|------------|--------------|-------|
| Col×Col | Wild type     | 24,624 | 1,104     | 10,015       | 12,651     | 854          | 7.86  |
| Col×Col | Wild type     | 21,161 | 938       | 8,034        | 11,416     | 773          | 8.78  |
| Col×Col | Wild type     | 24,760 | 1,052     | 10,053       | 12,742     | 913          | 8.33  |
| Col×Col | Wild type     | 21,222 | 901       | 8,020        | 11,565     | 736          | 8.41  |
| Col×Col | Wild type     | 23,913 | 1,087     | 10,105       | 11,771     | 950          | 8.59  |
| Col×Col | <i>msh2-1</i> | 26,220 | 1,187     | 10,021       | 14,036     | 976          | 8.88  |
| Col×Col | <i>msh2-1</i> | 20,792 | 908       | 8,019        | 11,094     | 771          | 8.77  |
| Col×Col | <i>msh2-1</i> | 8,610  | 365       | 3,188        | 4,746      | 311          | 8.89  |
| Col×Ler | Wild type     | 17,212 | 719       | 4,455        | 8,595      | 235          | 5.01  |
| Col×Ler | Wild type     | 13,382 | 473       | 4,064        | 6,346      | 254          | 5.88  |
| Col×Ler | Wild type     | 24,994 | 960       | 8,147        | 13,308     | 441          | 5.14  |
| Col×Ler | Wild type     | 24,563 | 990       | 7,969        | 13,422     | 481          | 5.69  |
| Col×Ler | Wild type     | 23,809 | 927       | 8,144        | 12,262     | 449          | 5.23  |
| Col×Ler | Wild type     | 25,445 | 909       | 8,008        | 13,107     | 409          | 4.86  |
| Col×Ler | Wild type     | 23,774 | 1,518     | 6,345        | 13,186     | 390          | 5.79  |
| Col×Ler | Wild type     | 23,064 | 863       | 8,141        | 11,788     | 422          | 4.93  |
| Col×Ler | Wild type     | 22,946 | 951       | 8,074        | 12,150     | 462          | 5.41  |
| Col×Ler | Wild type     | 21,778 | 1,978     | 4,844        | 11,616     | 332          | 6.41  |
| Col×Ler | <i>msh2-1</i> | 25,505 | 951       | 7,419        | 12,825     | 504          | 6.36  |
| Col×Ler | <i>msh2-1</i> | 21,105 | 1,271     | 5,877        | 11,013     | 440          | 6.97  |
| Col×Ler | <i>msh2-1</i> | 23,970 | 932       | 6,957        | 11,576     | 519          | 6.94  |
| Col×Ler | <i>msh2-1</i> | 29,605 | 1,138     | 8,073        | 14,903     | 601          | 6.93  |
| Col×Ler | <i>msh2-1</i> | 28,047 | 1,287     | 8,186        | 14,304     | 612          | 6.96  |
| Col×Ler | <i>msh2-1</i> | 24,880 | 1,220     | 7,980        | 13,162     | 594          | 6.93  |
| Col×Ler | <i>msh2-1</i> | 20,604 | 931       | 5,701        | 10,550     | 475          | 7.69  |
| Col×Ler | <i>msh2-1</i> | 28,238 | 1,140     | 7,932        | 13,949     | 575          | 6.76  |
| Col×Ler | <i>msh2-1</i> | 24,971 | 995       | 8,056        | 12,715     | 529          | 6.16  |
| Col×CLC | Wild type     | 22,353 | 1,225     | 7,975        | 12,429     | 724          | 8.32  |
| Col×CLC | Wild type     | 25,381 | 1,426     | 8,156        | 15,041     | 758          | 8.5   |
| Col×CLC | Wild type     | 16,356 | 1,153     | 8,480        | 5,711      | 1,012        | 10.66 |
| Col×CLC | Wild type     | 5,183  | 373       | 1,489        | 3,164      | 157          | 9.54  |
| Col×CLC | Wild type     | 22,224 | 1,233     | 8,014        | 12,318     | 659          | 7.6   |
| Col×CLC | Wild type     | 16,659 | 1,434     | 8,226        | 6,032      | 967          | 10.52 |
| Col×CLC | Wild type     | 15,069 | 1,181     | 8,022        | 5,174      | 692          | 7.94  |
| Col×CLC | Wild type     | 14,673 | 902       | 3,251        | 10,196     | 324          | 9.06  |
| Col×CLC | <i>msh2-1</i> | 19,658 | 1,740     | 9,000        | 7,020      | 1,898        | 17.42 |

|         |               |        |       |       |       |       |       |
|---------|---------------|--------|-------|-------|-------|-------|-------|
| Col×CLC | <i>msh2-1</i> | 18,586 | 1,639 | 8,117 | 7,079 | 1,751 | 17.74 |
| Col×CLC | <i>msh2-1</i> | 18,643 | 1,618 | 8,073 | 7,305 | 1,647 | 16.94 |
| Col×CLC | <i>msh2-1</i> | 12,776 | 935   | 5,029 | 5,470 | 1,342 | 21.06 |
| Col×CLC | <i>msh2-1</i> | 21,749 | 1,775 | 8,153 | 9,993 | 1,828 | 18.31 |
| Col×CLC | <i>msh2-1</i> | 19,072 | 1,567 | 8,046 | 7,617 | 1,842 | 18.63 |

508  
509  
510  
511  
512  
513  
514  
515  
516  
517  
518  
519  
520  
521  
522  
523  
524  
525  
526  
527  
528  
529  
530  
531  
532  
533  
534  
535  
536  
537  
538  
539  
540  
541  
542  
543  
544  
545  
546  
547  
548  
549  
550  
551  
552  
553  
554  
555  
556

557  
558  
559  
560  
561  
562  
563  
564  
565

**Appendix Table S8. 5.10 fluorescent seed count data for the wild type and *msh2* mutant in inbred and hybrid backgrounds.** Genetic distance in centimorgans (cM) is calculated as  $cM = 100 \times (1 - (1 - 2(N_G + N_R)/N_T)^{1/2})$ , where  $N_G$  is the number of green alone seeds,  $N_R$  is the number of red alone seeds and  $N_T$  is the total number of seeds of all classes analysed.  $X^2$  tests comparing the number of recombinant and non-recombinant seed counts were performed to test for significant differences between genotypes. The 5.10 FTL T-DNAs are 6,501,045-dsRed and 13,229,304-eGFP that define a 6.73 Mb interval that spans the centromere on chromosome 3.

| Cross   | Genotype      | Green alone | Red alone | Red and Green | Non-colour | Total seed | cM    |
|---------|---------------|-------------|-----------|---------------|------------|------------|-------|
| Col×Col | Wild type     | 195         | 181       | 1392          | 342        | 2110       | 19.78 |
| Col×Col | Wild type     | 106         | 81        | 663           | 164        | 1014       | 20.55 |
| Col×Col | Wild type     | 155         | 119       | 1052          | 281        | 1607       | 18.82 |
| Col×Col | Wild type     | 166         | 186       | 1209          | 248        | 1809       | 21.84 |
| Col×Col | Wild type     | 165         | 147       | 1178          | 293        | 1783       | 19.38 |
| Col×Col | Wild type     | 169         | 177       | 1359          | 321        | 2026       | 18.86 |
| Col×Col | <i>msh2-1</i> | 195         | 185       | 1319          | 319        | 2018       | 21.04 |
| Col×Col | <i>msh2-1</i> | 95          | 99        | 664           | 201        | 1059       | 20.4  |
| Col×Col | <i>msh2-1</i> | 123         | 128       | 982           | 218        | 1451       | 19.13 |
| Col×Col | <i>msh2-1</i> | 156         | 144       | 1207          | 327        | 1834       | 17.97 |
| Col×Col | <i>msh2-1</i> | 156         | 135       | 1070          | 246        | 1607       | 20.14 |
| Col×Col | <i>msh2-1</i> | 176         | 186       | 1373          | 390        | 2125       | 18.8  |
| Col×Col | <i>msh2-1</i> | 180         | 176       | 1425          | 349        | 2130       | 18.41 |
| Col×Col | <i>msh2-1</i> | 175         | 175       | 1362          | 347        | 2059       | 18.76 |
| Col×Col | <i>msh2-1</i> | 168         | 171       | 1191          | 324        | 1854       | 20.36 |
| Col×Col | <i>msh2-1</i> | 186         | 192       | 1401          | 339        | 2118       | 19.81 |
| Col×Ler | Wild type     | 187         | 196       | 1413          | 361        | 2157       | 19.7  |
| Col×Ler | Wild type     | 155         | 155       | 1342          | 297        | 1949       | 17.42 |
| Col×Ler | Wild type     | 190         | 180       | 1322          | 291        | 1983       | 20.83 |
| Col×Ler | Wild type     | 180         | 183       | 1364          | 336        | 2063       | 19.5  |
| Col×Ler | Wild type     | 148         | 158       | 1146          | 291        | 1743       | 19.45 |
| Col×Ler | Wild type     | 211         | 222       | 1482          | 327        | 2242       | 21.66 |
| Col×Ler | Wild type     | 173         | 202       | 1424          | 368        | 2167       | 19.14 |
| Col×Ler | Wild type     | 190         | 194       | 1417          | 339        | 2140       | 19.93 |
| Col×Ler | Wild type     | 179         | 185       | 1413          | 307        | 2084       | 19.34 |
| Col×Ler | Wild type     | 176         | 186       | 1377          | 385        | 2124       | 18.81 |
| Col×Ler | <i>msh2-1</i> | 147         | 158       | 1207          | 292        | 1804       | 18.65 |
| Col×Ler | <i>msh2-1</i> | 159         | 175       | 1441          | 344        | 2119       | 17.25 |
| Col×Ler | <i>msh2-1</i> | 162         | 168       | 1297          | 318        | 1945       | 18.72 |
| Col×Ler | <i>msh2-1</i> | 156         | 154       | 1345          | 343        | 1998       | 16.95 |
| Col×Ler | <i>msh2-1</i> | 160         | 171       | 1383          | 372        | 2086       | 17.38 |
| Col×Ler | <i>msh2-1</i> | 172         | 194       | 1315          | 322        | 2003       | 20.34 |
| Col×Ler | <i>msh2-1</i> | 146         | 109       | 1215          | 271        | 1741       | 15.91 |
| Col×CLC | Wild type     | 231         | 219       | 1341          | 253        | 2044       | 25.19 |
| Col×CLC | Wild type     | 97          | 95        | 532           | 122        | 846        | 26.1  |
| Col×CLC | Wild type     | 199         | 195       | 1251          | 251        | 1896       | 23.55 |

|         |               |     |     |      |     |      |       |
|---------|---------------|-----|-----|------|-----|------|-------|
| Col×CLC | Wild type     | 204 | 220 | 1261 | 278 | 1963 | 24.63 |
| Col×CLC | Wild type     | 191 | 191 | 1149 | 237 | 1768 | 24.64 |
| Col×CLC | Wild type     | 233 | 225 | 1273 | 282 | 2013 | 26.18 |
| Col×CLC | Wild type     | 252 | 251 | 1361 | 297 | 2161 | 26.89 |
| Col×CLC | Wild type     | 217 | 236 | 1379 | 305 | 2137 | 24.1  |
| Col×CLC | Wild type     | 218 | 229 | 1364 | 292 | 2103 | 24.18 |
| Col×CLC | Wild type     | 209 | 236 | 1350 | 299 | 2094 | 24.17 |
| Col×CLC | Wild type     | 236 | 228 | 1297 | 255 | 2016 | 26.54 |
| Col×CLC | Wild type     | 231 | 245 | 1245 | 275 | 1996 | 27.68 |
| Col×CLC | Wild type     | 248 | 241 | 1385 | 291 | 2165 | 25.95 |
| Col×CLC | Wild type     | 218 | 196 | 1164 | 266 | 1844 | 25.77 |
| Col×CLC | Wild type     | 230 | 209 | 1206 | 258 | 1903 | 26.61 |
| Col×CLC | Wild type     | 170 | 154 | 1016 | 209 | 1549 | 23.73 |
| Col×CLC | Wild type     | 211 | 284 | 1373 | 282 | 2150 | 26.55 |
| Col×CLC | <i>msh2-1</i> | 216 | 212 | 1283 | 268 | 1979 | 24.67 |
| Col×CLC | <i>msh2-1</i> | 236 | 236 | 1350 | 277 | 2099 | 25.82 |
| Col×CLC | <i>msh2-1</i> | 147 | 152 | 992  | 220 | 1511 | 22.27 |
| Col×CLC | <i>msh2-1</i> | 233 | 242 | 1387 | 288 | 2150 | 25.29 |
| Col×CLC | <i>msh2-1</i> | 244 | 240 | 1406 | 287 | 2177 | 25.48 |
| Col×CLC | <i>msh2-1</i> | 215 | 222 | 1298 | 298 | 2033 | 24.5  |
| Col×CLC | <i>msh2-1</i> | 245 | 231 | 1451 | 338 | 2265 | 23.86 |
| Col×CLC | <i>msh2-1</i> | 202 | 184 | 1182 | 297 | 1865 | 23.45 |
| Col×CLC | <i>msh2-1</i> | 192 | 211 | 1282 | 278 | 1963 | 23.23 |

566  
567  
568  
569  
570  
571  
572  
573  
574  
575  
576  
577  
578  
579  
580  
581  
582  
583  
584  
585  
586  
587  
588  
589  
590  
591

592 **Appendix Table S9. CEN3 crossover frequency in wild type and *msh2* Col/Ct**  
593 **hybrids.** Genetic distance in centimorgans (cM) is calculated as  $cM =$   
594  $100 \times (N_Y / (N_Y + N_{R+Y}))$ , where  $N_Y$  is the number of yellow alone pollen, and  $N_{Y+R}$  is the  
595 number of red and yellow pollen. The *CEN3* FTL T-DNAs are 11,115,724-eYFP and  
596 16,520,560-dsRed2 that define a 5.40 Mb interval located across the centromere of  
597 chromosome 3.  
598

| Cross    | Genotype    | Total | Red alone | Red + Green | Non-colour | Green alone | cM    |
|----------|-------------|-------|-----------|-------------|------------|-------------|-------|
| Col x Ct | Wild type   | 3656  | 228       | 1237        | 2065       | 126         | 10.19 |
| Col x Ct | Wild type   | 3175  | 195       | 1095        | 1790       | 95          | 8.68  |
| Col x Ct | Wild type   | 13563 | 697       | 5800        | 6522       | 544         | 9.38  |
| Col x Ct | Wild type   | 13698 | 812       | 6598        | 5638       | 650         | 9.85  |
| Col x Ct | Wild type   | 12981 | 673       | 5840        | 5840       | 628         | 10.75 |
| Col x Ct | Wild type   | 2133  | 82        | 752         | 1211       | 88          | 11.70 |
| Col x Ct | Wild type   | 5593  | 282       | 2326        | 2805       | 180         | 7.74  |
| Col x Ct | Wild type   | 4044  | 213       | 1302        | 2426       | 103         | 7.91  |
| Col x Ct | Wild type   | 5573  | 260       | 1591        | 3534       | 188         | 11.82 |
| Col x Ct | Wild type   | 6126  | 596       | 2251        | 3024       | 255         | 11.33 |
| Col x Ct | <i>msh2</i> | 14462 | 340       | 7080        | 6786       | 256         | 3.62  |
| Col x Ct | <i>msh2</i> | 12150 | 290       | 5170        | 6480       | 210         | 4.06  |
| Col x Ct | <i>msh2</i> | 3258  | 63        | 1443        | 1691       | 61          | 4.23  |
| Col x Ct | <i>msh2</i> | 3984  | 105       | 1884        | 1879       | 116         | 6.16  |
| Col x Ct | <i>msh2</i> | 3748  | 82        | 2030        | 1553       | 83          | 4.09  |
| Col x Ct | <i>msh2</i> | 10291 | 235       | 6054        | 3762       | 240         | 3.96  |
| Col x Ct | <i>msh2</i> | 6209  | 137       | 3148        | 2772       | 152         | 4.83  |
| Col x Ct | <i>msh2</i> | 13477 | 296       | 8408        | 4454       | 319         | 3.79  |

599  
600  
601  
602  
603  
604  
605  
606  
607  
608  
609  
610  
611  
612  
613  
614  
615  
616  
617  
618  
619  
620  
621  
622  
623



624  
625  
626  
627  
628  
629  
630  
631

**Appendix Table S10. Proportion of rod and ring bivalents at metaphase I in DAPI spreads from wild type and *msh2* hybrids.** The five bivalents of metaphase I DAPI spreads were scored as either rod (1 chiasmata) or ring (>1 chiasma) morphology. Pairwise Wilcoxon rank sum tests were performed, using the Benjamini & Hochberg correction for multiple testing, to test for significant differences between genotypes. Wild type and *msh2* were not significantly different in Col×Ler ( $P=0.957$ ) or Col×CLC ( $P=0.234$ ) backgrounds.

| Individual            | Rod | Ring | Proportion rod | Proportion ring |
|-----------------------|-----|------|----------------|-----------------|
| Col×Ler wild type     | 3   | 2    | 0.6            | 0.4             |
| Col×Ler wild type     | 2   | 3    | 0.4            | 0.6             |
| Col×Ler wild type     | 2   | 3    | 0.4            | 0.6             |
| Col×Ler wild type     | 2   | 3    | 0.4            | 0.6             |
| Col×Ler wild type     | 4   | 1    | 0.8            | 0.2             |
| Col×Ler wild type     | 2   | 3    | 0.4            | 0.6             |
| Col×Ler wild type     | 4   | 1    | 0.8            | 0.2             |
| Col×Ler wild type     | 2   | 3    | 0.4            | 0.6             |
| Col×Ler wild type     | 2   | 3    | 0.4            | 0.6             |
| Col×Ler wild type     | 3   | 2    | 0.6            | 0.4             |
| Col×Ler wild type     | 2   | 3    | 0.4            | 0.6             |
| Col×Ler wild type     | 2   | 3    | 0.4            | 0.6             |
| Col×Ler wild type     | 4   | 1    | 0.8            | 0.2             |
| Col×Ler wild type     | 2   | 3    | 0.4            | 0.6             |
| Col×Ler wild type     | 3   | 2    | 0.6            | 0.4             |
| Col×Ler wild type     | 3   | 2    | 0.6            | 0.4             |
| Col×Ler wild type     | 3   | 2    | 0.6            | 0.4             |
| Col×Ler wild type     | 2   | 3    | 0.4            | 0.6             |
| Col×Ler wild type     | 5   | 0    | 1              | 0               |
| Col×Ler wild type     | 4   | 1    | 0.8            | 0.2             |
| Total                 | 56  | 44   | 0.56           | 0.44            |
| Col×Ler <i>msh2-1</i> | 3   | 2    | 0.6            | 0.4             |
| Col×Ler <i>msh2-1</i> | 3   | 2    | 0.6            | 0.4             |
| Col×Ler <i>msh2-1</i> | 2   | 3    | 0.4            | 0.6             |
| Col×Ler <i>msh2-1</i> | 4   | 1    | 0.8            | 0.2             |
| Col×Ler <i>msh2-1</i> | 4   | 1    | 0.8            | 0.2             |
| Col×Ler <i>msh2-1</i> | 1   | 4    | 0.2            | 0.8             |
| Col×Ler <i>msh2-1</i> | 3   | 2    | 0.6            | 0.4             |
| Col×Ler <i>msh2-1</i> | 2   | 3    | 0.4            | 0.6             |
| Total                 | 22  | 18   | 0.55           | 0.45            |
| Col×CLC wild type     | 1   | 4    | 0.2            | 0.8             |
| Col×CLC wild type     | 1   | 4    | 0.2            | 0.8             |
| Col×CLC wild type     | 0   | 5    | 0              | 1               |
| Col×CLC wild type     | 2   | 3    | 0.4            | 0.6             |
| Col×CLC wild type     | 0   | 5    | 0              | 1               |
| Col×CLC wild type     | 0   | 5    | 0              | 1               |
| Col×CLC wild type     | 2   | 3    | 0.4            | 0.6             |
| Total                 | 6   | 29   | 0.17           | 0.83            |
| Col×CLC <i>msh2-1</i> | 1   | 4    | 0.2            | 0.8             |

|                       |   |    |     |     |
|-----------------------|---|----|-----|-----|
| Col×CLC <i>msh2-1</i> | 2 | 3  | 0.4 | 0.6 |
| Col×CLC <i>msh2-1</i> | 2 | 3  | 0.4 | 0.6 |
| Col×CLC <i>msh2-1</i> | 1 | 4  | 0.2 | 0.8 |
| Col×CLC <i>msh2-1</i> | 1 | 4  | 0.2 | 0.8 |
| Col×CLC <i>msh2-1</i> | 2 | 3  | 0.4 | 0.6 |
| Total                 | 9 | 21 | 0.3 | 0.7 |

632  
633  
634  
635  
636  
637  
638  
639  
640  
641  
642  
643  
644  
645  
646  
647  
648  
649  
650  
651  
652  
653  
654  
655  
656  
657  
658  
659  
660  
661  
662  
663  
664  
665  
666  
667  
668  
669  
670  
671  
672  
673  
674  
675  
676  
677  
678  
679

680 **Appendix Table S11. Alexander staining pollen viability counts in wild type and**  
681 ***msh2* mutants in inbred and hybrid backgrounds.** Pollen viability assays were  
682 performed on an average of nine plants per genotype. Viable pollen grains stain purple,  
683 whereas inviable pollen is misshapen and stains blue-green. 2×2 contingency tables were  
684 constructed using aggregate viable and inviable pollen, and  $X^2$  tests were performed to  
685 test for statistically significant differences between wild type and *msh2*.  
686

| Individual            | Viable | Inviabile | Total  | % viable | % inviable | P-value                 |
|-----------------------|--------|-----------|--------|----------|------------|-------------------------|
| Col×Col wild type     | 1,498  | 24        | 1,522  | 98.4     | 1.6        |                         |
| Col×Col wild type     | 1,484  | 26        | 1,510  | 98.3     | 1.7        |                         |
| Col×Col wild type     | 1,712  | 16        | 1,728  | 99.1     | 0.9        |                         |
| Col×Col wild type     | 1,591  | 14        | 1,605  | 99.1     | 0.9        |                         |
| Col×Col wild type     | 1,837  | 20        | 1,857  | 98.9     | 1.1        |                         |
| Col×Col wild type     | 1,793  | 15        | 1,808  | 99.2     | 0.8        |                         |
| Col×Col wild type     | 1,972  | 27        | 1,999  | 98.6     | 1.4        |                         |
| Total                 | 11,887 | 142       | 12,029 | 98.8     | 1.2        | -                       |
| Col×Col <i>msh2-1</i> | 1,464  | 36        | 1,500  | 97.6     | 2.4        |                         |
| Col×Col <i>msh2-1</i> | 1,398  | 40        | 1,438  | 97.2     | 2.8        |                         |
| Col×Col <i>msh2-1</i> | 1,361  | 26        | 1,387  | 98.1     | 1.9        |                         |
| Col×Col <i>msh2-1</i> | 1,683  | 47        | 1,730  | 97.3     | 2.7        |                         |
| Col×Col <i>msh2-1</i> | 1,831  | 62        | 1,893  | 96.7     | 3.3        |                         |
| Col×Col <i>msh2-1</i> | 1,892  | 39        | 1,931  | 98.0     | 2.0        |                         |
| Col×Col <i>msh2-1</i> | 1,995  | 23        | 2,018  | 98.9     | 1.1        |                         |
| Total                 | 11,624 | 273       | 11,897 | 97.7     | 2.3        | $5.7 \times 10^{-11}$   |
| Ler×Ler wild type     | 1,420  | 55        | 1,475  | 96.3     | 3.7        |                         |
| Ler×Ler wild type     | 2,000  | 4         | 2,004  | 99.8     | 0.2        |                         |
| Ler×Ler wild type     | 2,089  | 5         | 2,094  | 99.8     | 0.2        |                         |
| Ler×Ler wild type     | 2,147  | 11        | 2,158  | 99.5     | 0.5        |                         |
| Ler×Ler wild type     | 2,016  | 22        | 2,038  | 98.9     | 1.1        |                         |
| Ler×Ler wild type     | 2,016  | 6         | 2,022  | 99.7     | 0.3        |                         |
| Ler×Ler wild type     | 2,015  | 11        | 2,026  | 99.5     | 0.5        |                         |
| Ler×Ler wild type     | 2,135  | 8         | 2,143  | 99.6     | 0.4        |                         |
| Ler×Ler wild type     | 2,038  | 7         | 2,045  | 99.7     | 0.3        |                         |
| Ler×Ler wild type     | 2,012  | 14        | 2,026  | 99.3     | 0.7        |                         |
| Ler×Ler wild type     | 2,009  | 7         | 2,016  | 99.7     | 0.3        |                         |
| Total                 | 21,897 | 150       | 22,047 | 99.2     | 0.8        | -                       |
| Ler×Ler <i>msh2-1</i> | 2,309  | 65        | 2,374  | 97.3     | 2.7        |                         |
| Ler×Ler <i>msh2-1</i> | 2,032  | 50        | 2,082  | 97.6     | 2.4        |                         |
| Ler×Ler <i>msh2-1</i> | 2,043  | 85        | 2,128  | 96.0     | 4.0        |                         |
| Ler×Ler <i>msh2-1</i> | 921    | 37        | 958    | 96.1     | 3.9        |                         |
| Ler×Ler <i>msh2-1</i> | 2,032  | 61        | 2,093  | 97.1     | 2.9        |                         |
| Ler×Ler <i>msh2-1</i> | 2,004  | 128       | 2,132  | 94.0     | 6.0        |                         |
| Ler×Ler <i>msh2-1</i> | 2,031  | 41        | 2,072  | 98.0     | 2.0        |                         |
| Ler×Ler <i>msh2-1</i> | 2,061  | 40        | 2,101  | 98.1     | 1.9        |                         |
| Ler×Ler <i>msh2-1</i> | 1,981  | 179       | 2,160  | 91.7     | 8.3        |                         |
| Total                 | 17,414 | 686       | 18,100 | 96.2     | 3.8        | $< 2.2 \times 10^{-16}$ |
| CLC×CLC wild type     | 1,357  | 6         | 1,363  | 99.6     | 0.4        |                         |
| CLC×CLC wild type     | 1,343  | 11        | 1,354  | 99.2     | 0.8        |                         |

|                       |        |     |        |      |      |                         |
|-----------------------|--------|-----|--------|------|------|-------------------------|
| CLC×CLC wild type     | 1,612  | 3   | 1,615  | 99.8 | 0.2  |                         |
| CLC×CLC wild type     | 1,629  | 3   | 1,632  | 99.8 | 0.2  |                         |
| CLC×CLC wild type     | 1,642  | 7   | 1,649  | 99.6 | 0.4  |                         |
| CLC×CLC wild type     | 1,346  | 9   | 1,355  | 99.3 | 0.7  |                         |
| CLC×CLC wild type     | 1,706  | 12  | 1,718  | 99.3 | 0.7  |                         |
| CLC×CLC wild type     | 1,199  | 13  | 1,212  | 98.9 | 1.1  |                         |
| CLC×CLC wild type     | 1,636  | 19  | 1,655  | 98.9 | 1.1  |                         |
| CLC×CLC wild type     | 1,206  | 9   | 1,215  | 99.3 | 0.7  |                         |
| CLC×CLC wild type     | 1,721  | 14  | 1,735  | 99.2 | 0.8  |                         |
| Total                 | 16,397 | 106 | 16,503 | 99.3 | 0.7  | -                       |
| CLC×CLC <i>msh2-1</i> | 1,866  | 29  | 1,895  | 98.5 | 1.5  |                         |
| CLC×CLC <i>msh2-1</i> | 1,841  | 39  | 1,880  | 97.9 | 2.1  |                         |
| CLC×CLC <i>msh2-1</i> | 1,866  | 9   | 1,875  | 99.5 | 0.5  |                         |
| CLC×CLC <i>msh2-1</i> | 1,917  | 13  | 1,930  | 99.3 | 0.7  |                         |
| CLC×CLC <i>msh2-1</i> | 1,835  | 85  | 1,920  | 95.6 | 4.4  |                         |
| CLC×CLC <i>msh2-1</i> | 1,406  | 15  | 1,421  | 98.9 | 1.1  |                         |
| CLC×CLC <i>msh2-1</i> | 1,938  | 14  | 1,952  | 99.3 | 0.7  |                         |
| CLC×CLC <i>msh2-1</i> | 1,739  | 221 | 1,960  | 88.7 | 11.3 |                         |
| CLC×CLC <i>msh2-1</i> | 1,906  | 114 | 2,020  | 94.4 | 5.6  |                         |
| Total                 | 16,314 | 539 | 16,853 | 96.9 | 3.1  | < 2.2×10 <sup>-16</sup> |
| Col×CLC wild type     | 2,054  | 40  | 2,094  | 98.1 | 1.9  |                         |
| Col×CLC wild type     | 1,857  | 18  | 1,875  | 99.0 | 1.0  |                         |
| Col×CLC wild type     | 1,950  | 47  | 1,997  | 97.6 | 2.4  |                         |
| Col×CLC wild type     | 2,025  | 35  | 2,060  | 98.3 | 1.7  |                         |
| Col×CLC wild type     | 2,000  | 51  | 2,051  | 97.5 | 2.5  |                         |
| Col×CLC wild type     | 2,046  | 56  | 2,102  | 97.3 | 2.7  |                         |
| Col×CLC wild type     | 1,995  | 23  | 2,018  | 98.9 | 1.1  |                         |
| Col×CLC wild type     | 1,462  | 23  | 1,485  | 98.5 | 1.5  |                         |
| Total                 | 15,389 | 293 | 15,682 | 98.2 | 1.8  | -                       |
| Col×CLC <i>msh2-1</i> | 2,037  | 44  | 2,081  | 97.9 | 2.1  |                         |
| Col×CLC <i>msh2-1</i> | 1,836  | 48  | 1,884  | 97.5 | 2.5  |                         |
| Col×CLC <i>msh2-1</i> | 1,856  | 70  | 1,926  | 96.4 | 3.6  |                         |
| Col×CLC <i>msh2-1</i> | 1,917  | 34  | 1,951  | 98.3 | 1.7  |                         |
| Col×CLC <i>msh2-1</i> | 2,076  | 56  | 2,132  | 97.4 | 2.6  |                         |
| Col×CLC <i>msh2-1</i> | 2,088  | 50  | 2,138  | 97.7 | 2.3  |                         |
| Col×CLC <i>msh2-1</i> | 1,997  | 49  | 2,046  | 97.6 | 2.4  |                         |
| Col×CLC <i>msh2-1</i> | 2,212  | 73  | 2,285  | 96.8 | 3.2  |                         |
| Col×CLC <i>msh2-1</i> | 2,032  | 117 | 2,149  | 94.6 | 5.4  |                         |
| Col×CLC <i>msh2-1</i> | 2,031  | 57  | 2,088  | 97.3 | 2.7  |                         |
| Col×CLC <i>msh2-1</i> | 2,178  | 42  | 2,220  | 98.1 | 1.9  |                         |
| Col×CLC <i>msh2-1</i> | 1,968  | 28  | 1,996  | 98.6 | 1.4  |                         |
| Total                 | 24,228 | 668 | 24,896 | 97.3 | 2.7  | 5.18×10 <sup>-8</sup>   |

687  
688  
689  
690  
691  
692

693 **Appendix Table S12. 420 fluorescent seed count data for the wild type and *msh2***  
694 **mutants in recombinant lines with differing pattern of heterozygosity.** The following  
695 recombinant backgrounds were used: 'HOM-HOM' that are Col/Col inbred throughout the  
696 genome, 'HET-HET' that are Col/Ct heterozygous throughout the genome, 'HET-HOM'  
697 where the 420 region is Col/Ct heterozygous and the remainder of chromosome 3 is  
698 Col/Col homozygous, and 'HOM-HET' where 420 is Col/Col homozygous and the  
699 remainder of chromosome 3 is Col/Ct heterozygous. Genetic distance in centimorgans  
700 (cM) is calculated as  $cM = 100 \times (1 - (1 - 2(N_G + N_R) / N_T)^{1/2})$ , where  $N_G$  is the number of green  
701 alone seeds,  $N_R$  is the number of red alone seeds and  $N_T$  is the total number of seeds of  
702 all classes analysed. t-tests comparing the 420 recombination frequency between the  
703 groups were performed to test for significant differences between genotypes. The 420 FTL  
704 T-DNAs are 256,516-eGFP and 5,361,637-dsRed that define a 5.11 Mb interval that  
705 spans a subtelomeric region on chromosome 3.  
706

| Cross   | Genotype      | Green alone | Red alone | Red and Green | Non-colour | Total seed | cM    |
|---------|---------------|-------------|-----------|---------------|------------|------------|-------|
| HOM-HOM | Wild type     | 164         | 176       | 1301          | 356        | 1997       | 18.79 |
| HOM-HOM | Wild type     | 122         | 108       | 968           | 271        | 1469       | 17.12 |
| HOM-HOM | Wild type     | 165         | 155       | 1344          | 367        | 2031       | 17.24 |
| HOM-HOM | Wild type     | 186         | 153       | 1448          | 380        | 2167       | 17.11 |
| HOM-HOM | Wild type     | 224         | 199       | 1470          | 394        | 2287       | 20.62 |
| HOM-HOM | Wild type     | 188         | 177       | 1451          | 410        | 2226       | 18.02 |
| HOM-HOM | Wild type     | 152         | 151       | 1332          | 377        | 2012       | 16.41 |
| HOM-HOM | Wild type     | 150         | 126       | 1147          | 320        | 1743       | 17.34 |
| HOM-HOM | Wild type     | 131         | 145       | 1202          | 324        | 1802       | 16.71 |
| HOM-HOM | Wild type     | 171         | 149       | 1269          | 340        | 1929       | 18.26 |
| HOM-HOM | Wild type     | 149         | 112       | 1058          | 274        | 1593       | 18.01 |
| HOM-HOM | Wild type     | 93          | 119       | 837           | 193        | 1242       | 18.84 |
| HOM-HOM | Wild type     | 139         | 119       | 1030          | 257        | 1545       | 18.39 |
| HOM-HOM | Wild type     | 155         | 130       | 1064          | 245        | 1594       | 19.85 |
| HOM-HOM | Wild type     | 182         | 203       | 1676          | 399        | 2460       | 17.12 |
| HOM-HOM | Wild type     | 147         | 176       | 1447          | 350        | 2120       | 16.62 |
| HOM-HOM | Wild type     | 129         | 131       | 1150          | 260        | 1670       | 17.02 |
| HOM-HOM | Wild type     | 180         | 205       | 1571          | 427        | 2383       | 17.73 |
| HOM-HOM | Wild type     | 146         | 175       | 1354          | 323        | 1998       | 17.62 |
| HOM-HOM | Wild type     | 108         | 114       | 850           | 198        | 1270       | 19.35 |
| HOM-HOM | Wild type     | 180         | 224       | 1418          | 334        | 2156       | 20.93 |
| HOM-HOM | Wild type     | 162         | 168       | 1353          | 327        | 2010       | 18.05 |
| HOM-HOM | Wild type     | 204         | 196       | 1462          | 398        | 2260       | 19.62 |
| HOM-HOM | Wild type     | 158         | 172       | 1440          | 346        | 2116       | 17.05 |
| HOM-HOM | Wild type     | 214         | 228       | 1486          | 366        | 2294       | 21.60 |
| HOM-HOM | <i>msh2-2</i> | 65          | 48        | 477           | 59         | 649        | 19.27 |
| HOM-HOM | <i>msh2-2</i> | 188         | 172       | 1378          | 400        | 2138       | 18.56 |
| HOM-HOM | <i>msh2-2</i> | 220         | 177       | 1303          | 355        | 2055       | 21.67 |
| HOM-HOM | <i>msh2-2</i> | 166         | 109       | 929           | 238        | 1442       | 21.35 |
| HOM-HOM | <i>msh2-2</i> | 209         | 185       | 1345          | 362        | 2101       | 20.95 |
| HOM-HOM | <i>msh2-2</i> | 105         | 146       | 984           | 235        | 1470       | 18.85 |
| HOM-HOM | <i>msh2-2</i> | 191         | 133       | 1273          | 357        | 1954       | 18.25 |
| HOM-HOM | <i>msh2-2</i> | 98          | 94        | 730           | 188        | 1110       | 19.13 |
| HOM-HOM | <i>msh2-2</i> | 34          | 38        | 235           | 51         | 358        | 22.68 |
| HOM-HOM | <i>msh2-2</i> | 102         | 100       | 796           | 189        | 1187       | 18.78 |
| HOM-HOM | <i>msh2-2</i> | 162         | 186       | 1288          | 310        | 1946       | 19.85 |
| HOM-HOM | <i>msh2-2</i> | 165         | 166       | 1258          | 357        | 1946       | 18.77 |
| HOM-HOM | <i>msh2-2</i> | 152         | 137       | 1042          | 287        | 1618       | 19.83 |
| HOM-HOM | <i>msh2-2</i> | 164         | 170       | 1155          | 286        | 1775       | 21.03 |
| HOM-HOM | <i>msh2-2</i> | 165         | 177       | 1460          | 340        | 2142       | 17.50 |
| HOM-HOM | <i>msh2-2</i> | 194         | 200       | 1322          | 298        | 2014       | 21.98 |
| HOM-HOM | <i>msh2-2</i> | 155         | 142       | 1198          | 323        | 1818       | 17.95 |
| HOM-HOM | <i>msh2-2</i> | 149         | 172       | 1190          | 297        | 1808       | 19.69 |

|         |               |     |     |      |     |      |       |
|---------|---------------|-----|-----|------|-----|------|-------|
| HOM-HOM | <i>msh2-2</i> | 191 | 208 | 1547 | 359 | 2305 | 19.14 |
| HET-HET | Wild type     | 146 | 135 | 1390 | 385 | 2056 | 14.76 |
| HET-HET | Wild type     | 155 | 164 | 1400 | 408 | 2127 | 16.33 |
| HET-HET | Wild type     | 147 | 149 | 1406 | 414 | 2116 | 15.13 |
| HET-HET | Wild type     | 115 | 159 | 1248 | 325 | 1847 | 16.14 |
| HET-HET | Wild type     | 151 | 135 | 1225 | 339 | 1850 | 16.88 |
| HET-HET | Wild type     | 113 | 134 | 1126 | 301 | 1674 | 16.04 |
| HET-HET | Wild type     | 140 | 145 | 1454 | 357 | 2096 | 14.67 |
| HET-HET | Wild type     | 133 | 137 | 1296 | 388 | 1954 | 14.93 |
| HET-HET | Wild type     | 161 | 136 | 1445 | 398 | 2140 | 15.00 |
| HET-HET | Wild type     | 158 | 162 | 1589 | 478 | 2387 | 14.45 |
| HET-HET | Wild type     | 167 | 184 | 1463 | 418 | 2232 | 17.21 |
| HET-HET | Wild type     | 138 | 106 | 1263 | 357 | 1864 | 14.08 |
| HET-HET | Wild type     | 101 | 108 | 920  | 211 | 1340 | 17.05 |
| HET-HET | Wild type     | 140 | 156 | 1337 | 391 | 2024 | 15.89 |
| HET-HET | Wild type     | 145 | 154 | 1260 | 325 | 1884 | 17.38 |
| HET-HET | Wild type     | 179 | 143 | 1450 | 402 | 2174 | 16.11 |
| HET-HET | <i>msh2-3</i> | 89  | 86  | 648  | 145 | 968  | 20.10 |
| HET-HET | <i>msh2-3</i> | 137 | 116 | 888  | 223 | 1364 | 20.69 |
| HET-HET | <i>msh2-3</i> | 140 | 136 | 960  | 211 | 1447 | 21.35 |
| HET-HET | <i>msh2-3</i> | 68  | 72  | 532  | 137 | 809  | 19.14 |
| HET-HET | <i>msh2-3</i> | 112 | 103 | 696  | 186 | 1097 | 22.02 |
| HET-HET | <i>msh2-3</i> | 105 | 100 | 877  | 209 | 1291 | 17.39 |
| HET-HET | <i>msh2-3</i> | 89  | 109 | 854  | 213 | 1265 | 17.12 |
| HET-HET | <i>msh2-3</i> | 130 | 175 | 1080 | 261 | 1646 | 20.66 |
| HET-HET | <i>msh2-3</i> | 136 | 134 | 1123 | 253 | 1646 | 18.03 |
| HET-HET | <i>msh2-3</i> | 143 | 149 | 1195 | 274 | 1761 | 18.25 |
| HET-HET | <i>msh2-3</i> | 133 | 113 | 981  | 240 | 1467 | 18.48 |
| HET-HET | <i>msh2-3</i> | 154 | 157 | 1065 | 282 | 1658 | 20.95 |
| HET-HET | <i>msh2-3</i> | 86  | 86  | 610  | 129 | 911  | 21.11 |
| HET-HET | <i>msh2-3</i> | 70  | 65  | 410  | 95  | 640  | 23.97 |
| HET-HET | <i>msh2-3</i> | 107 | 100 | 660  | 174 | 1041 | 22.39 |
| HET-HET | <i>msh2-3</i> | 128 | 115 | 859  | 203 | 1305 | 20.78 |
| HET-HET | <i>msh2-3</i> | 86  | 86  | 610  | 129 | 911  | 21.11 |
| HET-HET | <i>msh2-3</i> | 85  | 96  | 628  | 145 | 954  | 21.23 |
| HET-HET | <i>msh2-3</i> | 91  | 93  | 590  | 158 | 932  | 22.21 |
| HET-HET | <i>msh2-3</i> | 125 | 131 | 916  | 204 | 1376 | 20.76 |
| HET-HOM | Wild type     | 264 | 259 | 1511 | 330 | 2364 | 25.33 |
| HET-HOM | Wild type     | 257 | 295 | 1381 | 335 | 2268 | 28.36 |
| HET-HOM | Wild type     | 298 | 265 | 1432 | 423 | 2418 | 26.90 |
| HET-HOM | Wild type     | 271 | 239 | 1355 | 273 | 2138 | 27.69 |
| HET-HOM | Wild type     | 299 | 259 | 1495 | 459 | 2512 | 25.45 |
| HET-HOM | Wild type     | 238 | 232 | 1222 | 222 | 1914 | 28.66 |
| HET-HOM | Wild type     | 232 | 266 | 1402 | 283 | 2183 | 26.26 |
| HET-HOM | Wild type     | 236 | 239 | 1378 | 295 | 2148 | 25.32 |
| HET-HOM | Wild type     | 236 | 287 | 1332 | 267 | 2122 | 28.79 |
| HET-HOM | Wild type     | 173 | 235 | 1268 | 299 | 1975 | 23.39 |
| HET-HOM | Wild type     | 209 | 267 | 1379 | 302 | 2157 | 25.26 |
| HET-HOM | Wild type     | 279 | 239 | 1483 | 382 | 2383 | 24.82 |
| HET-HOM | Wild type     | 258 | 264 | 1427 | 353 | 2302 | 26.08 |
| HET-HOM | Wild type     | 246 | 278 | 1440 | 284 | 2248 | 26.94 |
| HET-HOM | Wild type     | 253 | 242 | 1487 | 339 | 2321 | 24.27 |
| HET-HOM | <i>msh2-4</i> | 184 | 150 | 1316 | 354 | 2004 | 18.35 |
| HET-HOM | <i>msh2-4</i> | 198 | 194 | 1475 | 356 | 2223 | 19.54 |
| HET-HOM | <i>msh2-4</i> | 154 | 194 | 1608 | 383 | 2339 | 16.19 |
| HET-HOM | <i>msh2-4</i> | 200 | 180 | 1489 | 412 | 2281 | 18.34 |
| HET-HOM | <i>msh2-4</i> | 163 | 158 | 1413 | 319 | 2053 | 17.10 |
| HET-HOM | <i>msh2-4</i> | 177 | 176 | 1506 | 386 | 2245 | 17.20 |
| HET-HOM | <i>msh2-4</i> | 173 | 181 | 1447 | 386 | 2187 | 17.76 |
| HET-HOM | <i>msh2-4</i> | 197 | 159 | 1326 | 371 | 2053 | 19.18 |

|         |               |     |     |      |     |      |       |
|---------|---------------|-----|-----|------|-----|------|-------|
| HET-HOM | <i>msh2-4</i> | 200 | 160 | 1366 | 314 | 2040 | 19.56 |
| HET-HOM | <i>msh2-4</i> | 164 | 185 | 1513 | 387 | 2249 | 16.96 |
| HET-HOM | <i>msh2-4</i> | 162 | 166 | 1141 | 302 | 1771 | 20.65 |
| HET-HOM | <i>msh2-4</i> | 195 | 195 | 1549 | 354 | 2293 | 18.77 |
| HET-HOM | <i>msh2-4</i> | 175 | 216 | 1545 | 361 | 2297 | 18.79 |
| HET-HOM | <i>msh2-4</i> | 172 | 166 | 1414 | 344 | 2096 | 17.69 |
| HET-HOM | <i>msh2-4</i> | 199 | 174 | 1578 | 414 | 2365 | 17.26 |
| HET-HOM | <i>msh2-4</i> | 181 | 208 | 1534 | 420 | 2343 | 18.27 |
| HET-HOM | <i>msh2-4</i> | 160 | 190 | 1399 | 333 | 2082 | 18.53 |
| HET-HOM | <i>msh2-4</i> | 179 | 152 | 1362 | 329 | 2022 | 17.99 |
| HET-HOM | <i>msh2-4</i> | 174 | 187 | 1297 | 355 | 2013 | 19.92 |
| HOM-HET | Wild type     | 101 | 104 | 1417 | 427 | 2049 | 10.56 |
| HOM-HET | Wild type     | 97  | 114 | 1419 | 397 | 2027 | 11.02 |
| HOM-HET | Wild type     | 123 | 81  | 1269 | 369 | 1842 | 11.77 |
| HOM-HET | Wild type     | 92  | 100 | 1318 | 398 | 1908 | 10.63 |
| HOM-HET | Wild type     | 82  | 123 | 1437 | 427 | 2069 | 10.45 |
| HOM-HET | Wild type     | 65  | 57  | 970  | 273 | 1365 | 9.38  |
| HOM-HET | Wild type     | 99  | 107 | 1529 | 451 | 2186 | 9.92  |
| HOM-HET | Wild type     | 83  | 114 | 1423 | 431 | 2051 | 10.12 |
| HOM-HET | Wild type     | 105 | 100 | 1321 | 409 | 1935 | 11.22 |
| HOM-HET | Wild type     | 69  | 62  | 1149 | 325 | 1605 | 8.53  |
| HOM-HET | Wild type     | 64  | 89  | 999  | 284 | 1436 | 11.29 |
| HOM-HET | Wild type     | 100 | 123 | 1511 | 448 | 2182 | 10.80 |
| HOM-HET | Wild type     | 52  | 55  | 738  | 197 | 1042 | 10.86 |
| HOM-HET | <i>msh2-5</i> | 164 | 148 | 897  | 202 | 1411 | 25.32 |
| HOM-HET | <i>msh2-5</i> | 218 | 233 | 1386 | 356 | 2193 | 23.27 |
| HOM-HET | <i>msh2-5</i> | 142 | 156 | 946  | 210 | 1454 | 23.18 |
| HOM-HET | <i>msh2-5</i> | 213 | 196 | 1350 | 315 | 2074 | 22.18 |
| HOM-HET | <i>msh2-5</i> | 170 | 170 | 1121 | 240 | 1701 | 22.53 |
| HOM-HET | <i>msh2-5</i> | 220 | 234 | 1223 | 235 | 1912 | 27.54 |
| HOM-HET | <i>msh2-5</i> | 191 | 169 | 1063 | 250 | 1673 | 24.53 |
| HOM-HET | <i>msh2-5</i> | 200 | 246 | 1477 | 356 | 2279 | 21.99 |
| HOM-HET | <i>msh2-5</i> | 175 | 173 | 1085 | 244 | 1677 | 23.52 |
| HOM-HET | <i>msh2-5</i> | 155 | 178 | 1083 | 235 | 1651 | 22.76 |
| HOM-HET | <i>msh2-5</i> | 248 | 227 | 1432 | 303 | 2210 | 24.49 |
| HOM-HET | <i>msh2-5</i> | 171 | 207 | 1074 | 252 | 1704 | 25.41 |
| HOM-HET | <i>msh2-5</i> | 192 | 192 | 1213 | 263 | 1860 | 23.38 |
| HOM-HET | <i>msh2-5</i> | 209 | 192 | 1171 | 303 | 1875 | 24.35 |
| HOM-HET | <i>msh2-5</i> | 120 | 98  | 699  | 175 | 1092 | 22.49 |
| HOM-HET | <i>msh2-5</i> | 94  | 84  | 604  | 165 | 947  | 21.00 |
| HOM-HET | <i>msh2-5</i> | 149 | 167 | 1222 | 347 | 1885 | 18.47 |
| HOM-HET | <i>msh2-5</i> | 165 | 195 | 1334 | 357 | 2051 | 19.44 |
| HOM-HET | <i>msh2-5</i> | 127 | 142 | 857  | 201 | 1327 | 22.89 |
| HOM-HET | <i>msh2-5</i> | 142 | 130 | 897  | 236 | 1405 | 21.72 |
| HOM-HET | <i>msh2-5</i> | 96  | 115 | 678  | 175 | 1064 | 22.32 |
| HOM-HET | <i>msh2-5</i> | 86  | 106 | 719  | 164 | 1075 | 19.83 |
| HOM-HET | <i>msh2-5</i> | 224 | 201 | 1323 | 322 | 2070 | 23.23 |
| HOM-HET | <i>msh2-5</i> | 151 | 201 | 1272 | 309 | 1933 | 20.26 |
| HOM-HET | <i>msh2-5</i> | 135 | 198 | 1203 | 307 | 1843 | 20.09 |
| HOM-HET | <i>msh2-5</i> | 118 | 105 | 757  | 204 | 1184 | 21.05 |

707  
708  
709  
710  
711  
712  
713  
714  
715

716 **Appendix Table S13. 420 fluorescent seed count data for wild type and HEI10-OE in**  
717 **recombinant lines differing in the pattern of heterozygosity.** The following  
718 recombinant backgrounds were used: 'HOM-HOM' that are Col/Col inbred throughout the  
719 genome, 'HET-HET' that are Col/Ct heterozygous throughout the genome, 'HET-HOM'  
720 where the 420 region is Col/Ct heterozygous and the remainder of chromosome 3 is  
721 Col/Col homozygous, and 'HOM-HET' where 420 is Col/Col homozygous and the  
722 remainder of chromosome 3 is Col/Ct heterozygous. Genetic distance in centimorgans  
723 (cM) is calculated as  $cM = 100 \times (1 - (1 - 2(N_G + N_R) / N_T)^{1/2})$ , where  $N_G$  is the number of green  
724 alone seeds,  $N_R$  is the number of red alone seeds and  $N_T$  is the total number of seeds of  
725 all classes analysed. T-test comparing the 420 recombination frequency between the  
726 groups were performed to test for significant differences between genotypes. The 420  
727 FTL T-DNAs are 256,516-eGFP and 5,361,637-dsRed that define a 5.11 Mb interval that  
728 spans a subtelomeric region on chromosome 3.  
729

| Cross   | Genotype  | Green alone | Red alone | Red and Green | Non-colour | Total seed | cM    |
|---------|-----------|-------------|-----------|---------------|------------|------------|-------|
| HOM-HOM | Wild type | 443         | 411       | 2730          | 676        | 4260       | 22.60 |
| HOM-HOM | Wild type | 313         | 335       | 2633          | 710        | 3991       | 17.83 |
| HOM-HOM | Wild type | 355         | 352       | 2486          | 631        | 3824       | 20.61 |
| HOM-HOM | Wild type | 330         | 361       | 2374          | 681        | 3746       | 20.56 |
| HOM-HOM | Wild type | 351         | 343       | 2268          | 530        | 3492       | 22.38 |
| HOM-HOM | Wild type | 338         | 349       | 2629          | 648        | 3964       | 19.17 |
| HOM-HOM | Wild type | 347         | 417       | 2548          | 671        | 3983       | 21.49 |
| HOM-HOM | Wild type | 324         | 276       | 2089          | 536        | 3225       | 20.76 |
| HOM-HOM | Wild type | 385         | 412       | 3069          | 757        | 4623       | 19.06 |
| HOM-HOM | Wild type | 73          | 80        | 579           | 136        | 868        | 19.53 |
| HOM-HOM | Wild type | 324         | 321       | 2305          | 636        | 3586       | 19.98 |
| HOM-HOM | Wild type | 381         | 313       | 2519          | 667        | 3880       | 19.86 |
| HOM-HOM | Wild type | 320         | 310       | 2186          | 636        | 3452       | 20.31 |
| HOM-HOM | Wild type | 337         | 374       | 2588          | 683        | 3982       | 19.82 |
| HOM-HOM | Wild type | 372         | 334       | 2526          | 689        | 3921       | 20.01 |
| HOM-HOM | Wild type | 350         | 307       | 2448          | 683        | 3788       | 19.18 |
| HOM-HOM | Wild type | 248         | 248       | 1734          | 454        | 2684       | 20.60 |
| HOM-HOM | Wild type | 292         | 290       | 2310          | 596        | 3488       | 18.37 |
| HOM-HOM | Wild type | 376         | 324       | 2450          | 563        | 3713       | 21.07 |
| HOM-HOM | Wild type | 311         | 262       | 2175          | 590        | 3338       | 18.96 |
| HOM-HOM | Wild type | 128         | 128       | 969           | 222        | 1447       | 19.62 |
| HOM-HOM | HEI10-OE  | 296         | 323       | 1178          | 211        | 2008       | 38.08 |
| HOM-HOM | HEI10-OE  | 307         | 333       | 1253          | 220        | 2113       | 37.21 |
| HOM-HOM | HEI10-OE  | 307         | 355       | 1270          | 201        | 2133       | 38.41 |
| HOM-HOM | HEI10-OE  | 324         | 328       | 1276          | 217        | 2145       | 37.38 |
| HOM-HOM | HEI10-OE  | 285         | 290       | 1205          | 214        | 1994       | 34.94 |
| HOM-HOM | HEI10-OE  | 279         | 274       | 1250          | 273        | 2076       | 31.64 |
| HOM-HOM | HEI10-OE  | 262         | 297       | 1204          | 196        | 1959       | 34.48 |
| HOM-HOM | HEI10-OE  | 300         | 319       | 1236          | 183        | 2038       | 37.35 |
| HOM-HOM | HEI10-OE  | 346         | 328       | 1316          | 200        | 2190       | 37.99 |
| HOM-HOM | HEI10-OE  | 319         | 346       | 1234          | 192        | 2091       | 39.67 |
| HOM-HOM | HEI10-OE  | 471         | 551       | 2091          | 411        | 3524       | 35.19 |
| HOM-HOM | HEI10-OE  | 551         | 684       | 2492          | 443        | 4170       | 36.15 |
| HOM-HOM | HEI10-OE  | 528         | 617       | 2198          | 418        | 3761       | 37.46 |
| HOM-HOM | HEI10-OE  | 365         | 415       | 1589          | 242        | 2611       | 36.55 |
| HOM-HOM | HEI10-OE  | 300         | 250       | 1273          | 206        | 2029       | 32.33 |
| HOM-HOM | HEI10-OE  | 488         | 558       | 2054          | 401        | 3501       | 36.56 |
| HOM-HOM | HEI10-OE  | 595         | 596       | 2307          | 398        | 3896       | 37.66 |
| HOM-HOM | HEI10-OE  | 273         | 234       | 956           | 173        | 1636       | 38.34 |
| HET-HET | Wild type | 373         | 328       | 2825          | 734        | 4260       | 18.09 |
| HET-HET | Wild type | 273         | 266       | 2335          | 645        | 3519       | 16.71 |
| HET-HET | Wild type | 318         | 324       | 2736          | 721        | 4099       | 17.13 |
| HET-HET | Wild type | 400         | 326       | 2833          | 743        | 4302       | 18.61 |
| HET-HET | Wild type | 257         | 239       | 2194          | 656        | 3346       | 16.12 |
| HET-HET | Wild type | 191         | 155       | 1355          | 355        | 2056       | 18.55 |
| HET-HET | Wild type | 345         | 318       | 2533          | 733        | 3929       | 18.61 |
| HET-HET | Wild type | 277         | 327       | 2345          | 607        | 3556       | 18.74 |
| HET-HET | Wild type | 295         | 321       | 2433          | 669        | 3718       | 18.23 |
| HET-HET | Wild type | 142         | 158       | 1234          | 335        | 1869       | 17.60 |
| HET-HET | Wild type | 293         | 316       | 2272          | 509        | 3390       | 19.96 |
| HET-HET | Wild type | 210         | 237       | 1810          | 461        | 2718       | 18.08 |



|         |           |     |     |      |     |      |       |
|---------|-----------|-----|-----|------|-----|------|-------|
| HET-HET | Wild type | 303 | 308 | 2454 | 679 | 3744 | 17.93 |
| HET-HET | Wild type | 306 | 310 | 2258 | 640 | 3514 | 19.41 |
| HET-HET | Wild type | 338 | 374 | 2879 | 823 | 4414 | 17.70 |
| HET-HET | Wild type | 392 | 357 | 2602 | 696 | 4047 | 20.64 |
| HET-HET | Wild type | 405 | 422 | 2763 | 687 | 4277 | 21.69 |
| HET-HET | Wild type | 364 | 378 | 2270 | 580 | 3592 | 23.39 |
| HET-HET | HEI10-OE  | 624 | 549 | 2283 | 386 | 3842 | 37.60 |
| HET-HET | HEI10-OE  | 646 | 562 | 2185 | 389 | 3782 | 39.90 |
| HET-HET | HEI10-OE  | 540 | 626 | 2223 | 438 | 3827 | 37.50 |
| HET-HET | HEI10-OE  | 438 | 377 | 1446 | 257 | 2518 | 40.61 |
| HET-HET | HEI10-OE  | 336 | 358 | 1432 | 226 | 2352 | 35.98 |
| HET-HET | HEI10-OE  | 233 | 252 | 902  | 150 | 1537 | 39.26 |
| HET-HET | HEI10-OE  | 448 | 541 | 1902 | 349 | 3240 | 37.59 |
| HET-HET | HEI10-OE  | 513 | 453 | 1844 | 298 | 3108 | 38.49 |
| HET-HET | HEI10-OE  | 603 | 596 | 2159 | 435 | 3793 | 39.35 |
| HET-HOM | Wild type | 195 | 181 | 1150 | 255 | 1781 | 23.99 |
| HET-HOM | Wild type | 177 | 164 | 1065 | 229 | 1635 | 23.65 |
| HET-HOM | Wild type | 193 | 176 | 1119 | 257 | 1745 | 24.03 |
| HET-HOM | Wild type | 102 | 113 | 634  | 135 | 984  | 24.97 |
| HET-HOM | Wild type | 63  | 66  | 422  | 98  | 649  | 22.38 |
| HET-HOM | Wild type | 196 | 247 | 1269 | 258 | 1970 | 25.82 |
| HET-HOM | Wild type | 225 | 221 | 1315 | 296 | 2057 | 24.74 |
| HET-HOM | Wild type | 124 | 103 | 602  | 120 | 949  | 27.78 |
| HET-HOM | Wild type | 475 | 422 | 2396 | 603 | 3896 | 26.55 |
| HET-HOM | Wild type | 446 | 392 | 2628 | 607 | 4073 | 23.29 |
| HET-HOM | Wild type | 458 | 410 | 2332 | 541 | 3741 | 26.79 |
| HET-HOM | Wild type | 416 | 410 | 2380 | 635 | 3841 | 24.51 |
| HET-HOM | Wild type | 416 | 462 | 2468 | 585 | 3931 | 25.62 |
| HET-HOM | Wild type | 366 | 376 | 2177 | 457 | 3376 | 25.14 |
| HET-HOM | Wild type | 462 | 438 | 2509 | 588 | 3997 | 25.86 |
| HET-HOM | Wild type | 357 | 345 | 1896 | 439 | 3037 | 26.67 |
| HET-HOM | Wild type | 430 | 432 | 2269 | 521 | 3652 | 27.34 |
| HET-HOM | Wild type | 402 | 358 | 2232 | 540 | 3532 | 24.52 |
| HET-HOM | Wild type | 142 | 136 | 940  | 193 | 1411 | 22.16 |
| HET-HOM | Wild type | 351 | 411 | 2196 | 546 | 3504 | 24.83 |
| HET-HOM | HEI10-OE  | 380 | 362 | 1132 | 173 | 2047 | 47.56 |
| HET-HOM | HEI10-OE  | 324 | 336 | 1086 | 140 | 1886 | 45.22 |
| HET-HOM | HEI10-OE  | 360 | 317 | 1099 | 168 | 1944 | 44.91 |
| HET-HOM | HEI10-OE  | 300 | 238 | 823  | 120 | 1481 | 47.71 |
| HET-HOM | HEI10-OE  | 263 | 236 | 815  | 118 | 1432 | 44.95 |
| HET-HOM | HEI10-OE  | 348 | 327 | 1125 | 167 | 1967 | 43.99 |
| HET-HOM | HEI10-OE  | 342 | 338 | 1061 | 142 | 1883 | 47.30 |
| HET-HOM | HEI10-OE  | 310 | 304 | 966  | 164 | 1744 | 45.61 |
| HET-HOM | HEI10-OE  | 737 | 662 | 2175 | 250 | 3824 | 48.20 |
| HET-HOM | HEI10-OE  | 729 | 721 | 2263 | 390 | 4103 | 45.85 |
| HET-HOM | HEI10-OE  | 218 | 187 | 697  | 111 | 1213 | 42.36 |
| HET-HOM | HEI10-OE  | 129 | 141 | 443  | 67  | 780  | 44.53 |
| HET-HOM | HEI10-OE  | 386 | 314 | 1083 | 138 | 1921 | 47.92 |
| HET-HOM | HEI10-OE  | 302 | 261 | 972  | 163 | 1698 | 41.96 |
| HET-HOM | HEI10-OE  | 169 | 173 | 586  | 96  | 1024 | 42.38 |
| HET-HOM | HEI10-OE  | 669 | 619 | 2096 | 316 | 3700 | 44.88 |
| HET-HOM | HEI10-OE  | 786 | 699 | 2309 | 363 | 4157 | 46.56 |
| HET-HOM | HEI10-OE  | 657 | 685 | 2208 | 378 | 3928 | 43.72 |
| HET-HOM | HEI10-OE  | 678 | 652 | 2137 | 341 | 3808 | 45.09 |
| HET-HOM | HEI10-OE  | 744 | 674 | 2200 | 311 | 3929 | 47.26 |
| HET-HOM | HEI10-OE  | 675 | 728 | 2268 | 401 | 4072 | 44.24 |
| HOM-HET | Wild type | 148 | 155 | 2110 | 688 | 3101 | 10.30 |
| HOM-HET | Wild type | 244 | 258 | 2491 | 743 | 3736 | 14.49 |
| HOM-HET | Wild type | 123 | 134 | 1265 | 330 | 1852 | 15.00 |
| HOM-HET | Wild type | 216 | 197 | 2168 | 607 | 3188 | 13.92 |
| HOM-HET | Wild type | 194 | 198 | 2475 | 747 | 3614 | 11.51 |
| HOM-HET | Wild type | 175 | 155 | 2343 | 768 | 3441 | 10.10 |
| HOM-HET | Wild type | 51  | 54  | 471  | 144 | 720  | 15.84 |
| HOM-HET | Wild type | 142 | 171 | 1737 | 517 | 2567 | 13.04 |
| HOM-HET | Wild type | 189 | 234 | 2345 | 689 | 3457 | 13.09 |
| HOM-HET | Wild type | 79  | 131 | 1152 | 330 | 1692 | 13.30 |
| HOM-HET | Wild type | 180 | 212 | 2561 | 690 | 3643 | 11.41 |
| HOM-HET | Wild type | 177 | 167 | 1762 | 546 | 2652 | 13.94 |
| HOM-HET | Wild type | 177 | 167 | 1762 | 546 | 2652 | 13.94 |
| HOM-HET | Wild type | 190 | 210 | 2411 | 751 | 3562 | 11.94 |
| HOM-HET | Wild type | 149 | 136 | 1901 | 608 | 2794 | 10.78 |

|         |           |     |     |      |     |      |       |
|---------|-----------|-----|-----|------|-----|------|-------|
| HOM-HET | Wild type | 211 | 233 | 2651 | 782 | 3877 | 12.20 |
| HOM-HET | Wild type | 208 | 199 | 2235 | 674 | 3316 | 13.14 |
| HOM-HET | Wild type | 115 | 131 | 1357 | 444 | 2047 | 12.84 |
| HOM-HET | Wild type | 176 | 142 | 1755 | 565 | 2638 | 12.88 |
| HOM-HET | Wild type | 179 | 284 | 2998 | 859 | 4320 | 11.36 |
| HOM-HET | Wild type | 281 | 188 | 2673 | 817 | 3959 | 12.65 |
| HOM-HET | Wild type | 210 | 307 | 2838 | 860 | 4215 | 13.13 |
| HOM-HET | Wild type | 210 | 209 | 2850 | 793 | 4062 | 10.91 |
| HOM-HET | Wild type | 179 | 220 | 2762 | 785 | 3946 | 10.68 |
| HOM-HET | Wild type | 164 | 188 | 2497 | 802 | 3651 | 10.16 |
| HOM-HET | Wild type | 194 | 217 | 2585 | 811 | 3807 | 11.45 |
| HOM-HET | Wild type | 197 | 212 | 2436 | 746 | 3591 | 12.12 |
| HOM-HET | Wild type | 241 | 229 | 2909 | 864 | 4243 | 11.77 |
| HOM-HET | Wild type | 206 | 201 | 2425 | 699 | 3531 | 12.28 |
| HOM-HET | Wild type | 132 | 157 | 1656 | 429 | 2374 | 13.02 |
| HOM-HET | Wild type | 125 | 152 | 1673 | 521 | 2471 | 11.92 |
| HOM-HET | HEI10-OE  | 232 | 167 | 917  | 164 | 1480 | 32.12 |
| HOM-HET | HEI10-OE  | 287 | 294 | 1420 | 228 | 2229 | 30.81 |
| HOM-HET | HEI10-OE  | 204 | 209 | 1011 | 197 | 1621 | 29.97 |
| HOM-HET | HEI10-OE  | 205 | 215 | 999  | 239 | 1658 | 29.76 |
| HOM-HET | HEI10-OE  | 191 | 198 | 1030 | 193 | 1612 | 28.07 |
| HOM-HET | HEI10-OE  | 188 | 199 | 1008 | 205 | 1600 | 28.15 |
| HOM-HET | HEI10-OE  | 108 | 131 | 659  | 146 | 1044 | 26.37 |
| HOM-HET | HEI10-OE  | 108 | 105 | 638  | 118 | 969  | 25.14 |
| HOM-HET | HEI10-OE  | 269 | 234 | 1270 | 255 | 2028 | 29.01 |
| HOM-HET | HEI10-OE  | 219 | 221 | 1114 | 213 | 1767 | 29.15 |
| HOM-HET | HEI10-OE  | 250 | 260 | 1173 | 199 | 1882 | 32.32 |
| HOM-HET | HEI10-OE  | 233 | 247 | 1112 | 213 | 1805 | 31.58 |
| HOM-HET | HEI10-OE  | 243 | 269 | 1314 | 252 | 2078 | 28.78 |
| HOM-HET | HEI10-OE  | 120 | 102 | 552  | 96  | 870  | 30.02 |
| HOM-HET | HEI10-OE  | 317 | 324 | 1355 | 222 | 2218 | 35.04 |
| HOM-HET | HEI10-OE  | 272 | 251 | 1345 | 241 | 2109 | 29.00 |
| HOM-HET | HEI10-OE  | 184 | 235 | 1152 | 229 | 1800 | 26.89 |
| HOM-HET | HEI10-OE  | 99  | 116 | 543  | 102 | 860  | 29.29 |
| HOM-HET | HEI10-OE  | 548 | 538 | 2505 | 502 | 4093 | 31.49 |
| HOM-HET | HEI10-OE  | 373 | 415 | 1916 | 419 | 3123 | 29.62 |
| HOM-HET | HEI10-OE  | 425 | 405 | 2078 | 429 | 3337 | 29.11 |
| HOM-HET | HEI10-OE  | 246 | 252 | 1339 | 273 | 2110 | 27.34 |
| HOM-HET | HEI10-OE  | 369 | 303 | 1678 | 345 | 2695 | 29.20 |
| HOM-HET | HEI10-OE  | 481 | 562 | 2544 | 585 | 4172 | 29.29 |
| HOM-HET | HEI10-OE  | 525 | 519 | 2275 | 478 | 3797 | 32.91 |
| HOM-HET | HEI10-OE  | 521 | 493 | 2392 | 559 | 3965 | 30.11 |
| HOM-HET | HEI10-OE  | 539 | 532 | 2581 | 477 | 4129 | 30.63 |
| HOM-HET | HEI10-OE  | 440 | 586 | 2270 | 455 | 3751 | 32.70 |
| HOM-HET | HEI10-OE  | 510 | 588 | 2579 | 444 | 4121 | 31.65 |
| HOM-HET | HEI10-OE  | 491 | 594 | 2563 | 480 | 4128 | 31.13 |
| HOM-HET | HEI10-OE  | 561 | 625 | 2419 | 478 | 4083 | 35.27 |
| HOM-HET | HEI10-OE  | 468 | 561 | 2453 | 524 | 4006 | 30.27 |
| HOM-HET | HEI10-OE  | 209 | 265 | 1163 | 221 | 1858 | 30.02 |
| HOM-HET | HEI10-OE  | 481 | 568 | 2533 | 479 | 4061 | 30.47 |
| HOM-HET | HEI10-OE  | 194 | 160 | 756  | 139 | 1249 | 34.19 |
| HOM-HET | HEI10-OE  | 512 | 576 | 2212 | 428 | 3728 | 35.48 |

730  
731  
732
